# Supplementary material for: Discovery of Novel miRNAs in Colorectal Cancer: Potential Biological Roles and Clinical Utility
Source: Noncoding RNA. 2023 Oct 26;9(6):65. doi: 10.3390/ncrna9060065 (PMC10660700; doi:10.3390/ncrna9060065)
Supplement: Supplementary file 1 [file ncrna-09-00065-s001.zip › ncrna-2621315-supplementary-tables.xlsx]

## Sheet: Table S1
Supplementary Table S1. Detailed information of the 358 predicted novel miRNAs detected in colorectal tissues (N=522) from TCGA. RPM: reads per million.
miRMaster ID of predicted novel miRNA	Position	Novomirank_score	5p sequence	5p Sequence lenght	5p GC Content	3p Sequence	3p Sequence lenght	3p GC Content	miRMaster Probability	Adjacent normal tissue expression (Mean RPM)	CRC tissue expression (Mean RPM)	Fold Change -log2(FC+1.2) (Tumor/Normal)	Detected in validation group (GSE89974, N=55).
nov-miR-1156-3p	chr11-:1477615_1477671	1	GGCACUGACCACGUCACUGGA	21	0.619048	CAGUGUCUGGUGAGGGUCCC	20	0.65	0.585	1.02788	0.261189	0.254104	yes
nov-miR-1156-5p	chr11-:1477615_1477671	1	GGCACUGACCACGUCACUGGA	21	0.619048	CAGUGUCUGGUGAGGGUCCC	20	0.65	0.585	1.51218	1.17161	0.774783	yes
nov-miR-13172-3p	chr9+:115489101_115489152	0.948	AGGAAUGUAGAGUCAGAUUCA	21	0.380952	ACUCUGGACUCUGAAUUCUGC	21	0.47619	0.53	2.22247	3.49757	1.57373	yes
nov-miR-13634-5p	chr9-:32456303_32456370	0.971	AAAAGCUGUCCACUGUAGAGU	21	0.428571	UCUACAGUGGUCAGCUUUUAG	21	0.428571	0.797	0.628002	1.38393	2.2037	yes
nov-miR-13844-5p	chrX+:14467325_14467382	0.776	AAUGCAGCCUGAGUAGUACUA	21	0.428571	GUACUAUGAGGUUCUGCAUUUC	22	0.409091	0.721	0	0.303979	#DIV/0!	yes
nov-miR-13996-5p	chrX+:7187376_7187444	0.828	AUCCUAGCUUGCCUGAGACUGU	22	0.5	AGUCCUAGACACACUGGGAUGU	22	0.5	0.626	0.534368	0.499407	0.934574	yes
nov-miR-171-3p	chr10+:30434151_30434212	1.763	GGGCGGUCUGAGCGUGCGGGCG	22	0.818182	UCCGCUCCGCUCUGGACUGCGCGC	24	0.75	0.541	1.32475	0.709693	0.535717	yes
nov-miR-2199-5p	chr13+:35530337_35530399	1.826	GGCGGCCUGUCCCCAGUGC	19	0.789474	GAUGGGGACAGCCGCCCC	18	0.777778	0.502	0.888818	1.00314	1.12863	yes
nov-miR-2549-5p	chr14+:105907193_105907262	1.246	UGGGGCUGUGUCACUGUGGGUA	22	0.590909	CUCACAGUGACACGAGCCCCCAC	23	0.652174	0.652	1.80815	0.184192	0.101868	yes
nov-miR-3345-5p	chr15-:66347280_66347343	0.896	UGUGACUGUUCCUGGUAUUGAUU	23	0.391304	GUGCAACCAUAGACAGUCACACA	23	0.478261	0.563	0.249702	0.841875	3.37152	yes
nov-miR-4285-5p	chr17+:7574713_7574777	1.097	UGUCCCUGACCUGGGUAGAGUGGC	24	0.625	CCAUCUCAUAUCAGCCAGGGACAAA	25	0.48	0.526	2.65287	0.765334	0.288493	yes
nov-miR-5035-3p	chr19+:12952630_12952689	1.201	UGGGGAGAGGAGGGGACCAGGG	22	0.727273	CUUCCCCACCCUCUCCUGCAGC	22	0.681818	0.529	1.02513	0.172833	0.168597	yes
nov-miR-5065-5p	chr19+:18284683_18284741	1.041	GUGUGUGCACCUGUGUCUGUCUGU	24	0.541667	AGACAGACGCAGGUACACACAG	22	0.545455	0.874	0.756646	0.113995	0.150658	yes
nov-miR-590-5p	chr10-:79594710_79594782	1.715	CUGGCACUCUGAGGUCUCUGUGGC	24	0.625	CAGAGGGCCCAGUGGUGCCCCAG	23	0.73913	0.536	0.777612	0.641104	0.824453	yes
nov-miR-6348-3p	chr1-:156540916_156540987	1.615	UCGGGCAGGGGCUGGUGAGGAGGCCUC	27	0.740741	UGCCUCCUCCCUUCCUCCCAGU	22	0.636364	0.578	0.799116	0.529514	0.662625	yes
nov-miR-651-5p	chr11+:100970875_100970932	0.977	GAGGCUGAAUUCCCAGUGAGUG	22	0.545455	UUCGCUGGGAAUUCAGCCUCUG	22	0.545455	0.765	0.341691	0.271575	0.794797	yes
nov-miR-7154-5p	chr20-:38425272_38425332	1.025	UCCCUGUAUUCGAAAGUGAUCGUGG	25	0.48	CUGGUCAUUGAUAGUGCAGGGAGA	24	0.5	0.55	0.4187	1.50069	3.58418	yes
nov-miR-766-3p	chr11+:16745130_16745195	1.136	CUACACUUUCAGAGAUUAUUU	21	0.285714	AAGUUUCUCUGAAUGUGUAGAA	22	0.318182	0.542	0.325016	2.31015	7.10779	yes
nov-miR-8861-5p	chr2-:69520113_69520174	0.902	UUCCAAAGUGUUGAGUUCAGUCCAG	25	0.44	GUUCUGUUAAUUAAACUUUGGGACA	25	0.32	0.573	0.576079	0.739995	1.28454	yes
nov-miR-8999-3p	chr3+:124093102_124093160	1.325	GGGGCAGGCGGUGGAGGUUGU	21	0.714286	UCCCUCUCCCUCCUUGCUCCUA	22	0.590909	0.529	0.612281	0.0291759	0.0476512	yes
nov-miR-9377-5p	chr3-:105256034_105256099	0.875	GCUGUGAUGGCCGAGUGGUUAA	22	0.545455	AAUUUCUGUGCAGCAUCACACCU	23	0.434783	0.513	0.576988	2.82619	4.89817	yes
nov-miR-9095-5p	chr3+:158644537_158644593	1.055	CAUUGGCUGCCGGCGUGACUUUG	23	0.608696	GCGUUACCGGCAGCUGAACCC	21	0.666667	0.542	0.400452	0.106275	0.265388	no
nov-miR-8666-5p	chr2-:207529538_207529592	1.318	GGUGAGCGGCGGGCUAGAAGGC	22	0.727273	CCUGGCUCUGCUCUUGACCGC	21	0.666667	0.55	0.546581	0.0971	0.17765	no
nov-miR-367-3p	chr10-:113291630_113291681	1.11	CAGGCCCAACAUGAUCCAUAUC	22	0.5	AAUGAAUCAUGUUGGGCCUGUA	22	0.409091	0.535	0.498938	0.0751411	0.150602	no
nov-miR-11249-3p	chr6+:27807533_27807593	1.244	GAGCUGGUGUACUUGGUGACGG	22	0.590909	GACACCGCGUGCUUGGCCAGCUCCC	25	0.72	0.559	0.343223	0.0441078	0.128511	no
nov-miR-8757-3p	chr2-:27071528_27071580	1.98	GUCCCACGGGCCAGCCCCGCC	21	0.857143	CCGUGGCUGGCCCGUGGGGCGA	22	0.818182	0.516	0.544436	0.0531573	0.0976374	no
nov-miR-9430-5p	chr3-:127759703_127759760	0.973	AGAAGGAGCUGGGCUGAUCUGA	22	0.545455	UGCAUCAGGCCACUCCUUCCUC	22	0.590909	0.747	0.773572	0.0841227	0.108746	no
nov-miR-5688-3p	chr1+:153536278_153536333	1.595	UCGGCAAGGGGAGCAGGAGGAGGACU	26	0.653846	UCACCCCUGCUUCCUCUGCCAGA	23	0.608696	0.532	0.389197	0.0326376	0.0838588	no
nov-miR-2026-5p	chr12-:54409351_54409418	1.61	CUGGAGGGAGGGAGGAAGGGCCU	23	0.695652	GCCCCUCCUCCUGGGCCCUCCCAGGC	26	0.807692	0.594	0.760001	0.0659517	0.0867785	no
nov-miR-264-3p	chr10+:73782259_73782323	1.383	UGGGUAGGAGGGCAGGAAGGUGGGUCU	27	0.62963	UCCCCCGGAUCUGCCCCUCCAGA	23	0.695652	0.523	0.745834	0.036047	0.0483312	no
nov-miR-5943-5p	chr1+:2319566_2319626	1.455	CUCCCAGGGACCAGAGGCUGGA	22	0.681818	CCGCCCUGGGCUCUGGGAGCC	21	0.809524	0.629	0.274213	0.0131285	0.0478769	no
nov-miR-2026-3p	chr12-:54409351_54409418	1.61	CUGGAGGGAGGGAGGAAGGGCCU	23	0.695652	GCCCCUCCUCCUGGGCCCUCCCAGGC	26	0.807692	0.594	0.293881	0.0118116	0.0401917	no
nov-miR-5691-3p	chr1+:153778404_153778461	1.164	GCAGGAGAGGGGGCUCAUGUGAC	23	0.652174	UACCCAGGUCUCCCUUUCCCCA	22	0.590909	0.505	0.305568	0.00865117	0.0283118	no
nov-miR-3330-3p	chr15-:63318633_63318697	1.486	UGGGCUCCCACCCAUAGGGCGAG	23	0.695652	CGCCCUGUGGGUGGGAGGCCAGA	23	0.73913	0.638	1.10732	0.0137733	0.0124385	no
nov-miR-8993-5p	chr3+:122891470_122891530	1.178	GGUCAGGACUGGCCCAGAGGACA	23	0.652174	UCCUCCCAGCUCCAGGGCCUG	21	0.714286	0.549	1.3613	0.0030187	0.00221752	no
nov-miR-13133-5p	chr9+:105635067_105635122	0.684	UUUACACUGUGCUGGACUGAG	21	0.47619	AGGUCCAUGUACCCUGUGAAAC	22	0.5	0.7	3.34374	0.0146828	0.00439114	no
nov-miR-7648-5p	chr22-:19065631_19065691	0.977	AAGUGAGAGGACGCUGGCCAGA	22	0.590909	UGGCUGGCUCCUUAGCUUUG	20	0.55	0.559	0.852425	0.0882275	0.103502	no
nov-miR-6718-3p	chr1-:44884292_44884355	1.198	AGAGGUGGUGGGAAGUAUGCA	21	0.52381	CCCAUACUUUCACCCCUCUCU	21	0.52381	0.677	0.93106	0.166824	0.179177	no
nov-miR-2957-5p	chr15+:20008384_20008453	1.258	UGGGGCUGUGUCACUGUGGGCA	22	0.636364	CUCACAGUGACACAAGCCCCCAC	23	0.608696	0.695	1.21176	0.0862756	0.0711986	no
nov-miR-2755-5p	chr14-:105865529_105865581	0.749	CUGAGCUGAGAACCACUGUGCU	22	0.545455	CACAGUGAUUGGCAGCUCUACA	22	0.5	0.667	0.427818	0.0214492	0.0501362	no
nov-miR-10030-5p	chr4+:85673664_85673719	0.895	AUGCUUAGAUCUCCCCACUGGU	22	0.5	CAGUGGGGGGAUCUAAGCAUUG	22	0.545455	0.776	0.302122	0.0286193	0.0947278	no
nov-miR-5176-3p	chr19+:47002885_47002941	1.337	AGUGUGGAGGGGGUGGUGAGG	21	0.666667	UCUCUACCCCUCUCCUCACAGA	22	0.545455	0.506	0.991484	0.065387	0.0659486	no
nov-miR-2551-5p	chr14+:105916808_105916877	1.21	UGGGGCUGUGUCACUGUGGGCA	22	0.636364	CUCACAGUGACACGAGCCCCCAC	23	0.652174	0.697	1.28102	0.105639	0.0824644	no
nov-miR-9118-5p	chr3+:170222444_170222515	1.853	CCCGGGCGGCUGUAGAGGCGGC	22	0.818182	CGGUUCCGGCUGCUCCGGCGA	21	0.761905	0.506	0.619652	0.175864	0.283811	no
nov-miR-1870-3p	chr12-:124437442_124437502	1.095	CCAGGCUCAGGGAAACUGAGAC	22	0.590909	CCCCCUUUCCCUGAGCCUGCAU	22	0.636364	0.519	0.823126	0.0320357	0.0389196	no
nov-miR-401-5p	chr10-:124059467_124059538	1.387	CAGGUCAAAGUGGGCAAGGGGA	22	0.590909	CCCUGCUCCUUCUGUCCUUAA	21	0.52381	0.598	1.63507	0.0958594	0.0586271	no
nov-miR-985-3p	chr11+:75938817_75938869	0.986	GAGUUCUCUGUGUGCAGUUCUG	22	0.5	GUACUGUGCCCUGAGAACUCUC	22	0.545455	0.561	0.789005	0.116883	0.14814	no
nov-miR-4148-3p	chr17+:45132645_45132702	1.133	UCAGCGCUCGCCCCUGCUCGUG	22	0.727273	UUAGUCCGGGCGAGCCUCUGAUC	23	0.608696	0.512	0.460209	0.0916679	0.199187	no
nov-miR-7756-3p	chr22-:40956705_40956768	0.859	CCACCACGCCUGGCCUAAGAGU	22	0.636364	UUGAGGUCGGACAUGGUGGCU	21	0.571429	0.737	1.77426	0.359673	0.202717	no
nov-miR-12572-5p	chr8+:125594073_125594130	1.016	GGGUGGACAGGUCUUGAAGUC	21	0.571429	UUUCCAGACCAGGUCUCACCCAG	23	0.565217	0.582	1.99994	0.399758	0.199885	no
nov-miR-8954-5p	chr3+:111089410_111089463	1.529	UGUGUGUGUGUGUGUGUGUGU	21	0.47619	AUAUACAUACACACACAUAUA	21	0.238095	0.578	1.64177	0.602404	0.366925	no
nov-miR-5976-3p	chr1+:247194461_247194522	1.566	UCCACACACAAGCAUACAUAU	21	0.380952	UGUGUGUGUGUGUGUGUGUGU	21	0.47619	0.52	1.61122	0.597529	0.370856	no
nov-miR-10741-5p	chr5-:134504421_134504488	1.07	UUGCUGGGCUUAGGGACUGUGU	22	0.545455	AUGGUCUCCAAGCCUAGCAAAC	22	0.5	0.74	0.693674	0.100874	0.14542	no
nov-miR-456-3p	chr10-:24723852_24723912	1.788	GCUCCGCGCGGCCACGGAGCGA	22	0.818182	GCGUUCGCGGGCGCCGGAGCUG	22	0.818182	0.544	0.628512	0.0942376	0.149938	no
nov-miR-13593-5p	chr9-:137007525_137007586	1.057	UGCCCGGCCUCGGAACCAGCUU	22	0.681818	GCUGAUGCCGAGAGCGGGCUGU	22	0.681818	0.512	0.460425	0.139173	0.30227	no
nov-miR-10548-5p	chr5+:34655570_34655623	1.186	AGAGAAGCUGUCGGGGACCUGG	22	0.636364	CUGUACCCCGUGGCUUCUCACA	22	0.590909	0.551	0.454812	0.029861	0.0656557	no
nov-miR-2522-3p	chr14+:102039161_102039224	1.206	UGUCAUGCAGGAGGUGGAGACCG	23	0.608696	CUCUCCACCGCCUGCAGCAGC	21	0.714286	0.621	0.472248	0.0432621	0.0916088	no
nov-miR-3890-3p	chr16-:48541228_48541291	1.003	ACAGCUCCCAUGCCUCAGCUUU	22	0.545455	AACUGAGGUGUGCGGGCUGGAG	22	0.636364	0.709	1.07599	0.185186	0.172108	no
nov-miR-5891-3p	chr1+:219173859_219173920	1.355	GCGGAACCGCAUGACUGGCAGUG	23	0.652174	CUGCGUCGGGGUCGGUUCUGCAG	23	0.695652	0.521	0.924812	0.128261	0.138688	no
nov-miR-931-5p	chr11+:66627123_66627186	0.909	UACCCUGACUGUCCCUCUGUAG	22	0.545455	CUGUUGGGACAGUCAGUUGGUAUG	24	0.5	0.579	1.14909	0.399205	0.347409	no
nov-miR-7088-5p	chr20-:23097789_23097852	1.009	UUUGCCAGAUCCUUGCACGGGU	22	0.545455	CCGUGCAAGGAUCUGGCAAAGC	22	0.590909	0.605	0.574614	0.150425	0.261785	no
nov-miR-4539-5p	chr17-:40122368_40122429	1.681	CGUGGAGGCCGCGGCUGAGGCCC	23	0.826087	GCCUCGCCGCCGCCUCUGCUGC	22	0.818182	0.583	0.866758	0.292722	0.33772	no
nov-miR-2886-3p	chr14-:73644884_73644951	1.303	CUAUCCCCGGCAGCGGUCCUUU	22	0.636364	CGGGGCAUUGUGGGACUGCGU	21	0.666667	0.507	0.652492	0.100801	0.154487	no
nov-miR-4593-5p	chr17-:48122185_48122244	1.094	GACAGUAACAGCCCGGGACAGCC	23	0.652174	CCCCUGGGCUGUUACUGUUCC	21	0.619048	0.696	0.395321	0.0817255	0.206732	no
nov-miR-11565-5p	chr6-:159780320_159780380	0.921	UUCCCAUUUAUUUGCUGCUUGU	22	0.363636	GAGCAGUUAUACGCAUGGGAUAA	23	0.434783	0.549	3.30537	1.66279	0.503056	no
nov-miR-1053-5p	chr11-:102111291_102111345	1.432	CUGGUCACCGCGGCGGAGUGGA	22	0.727273	CACUUCGCCUCGGGACCCCCA	21	0.714286	0.631	0.619177	0.149902	0.242099	no
nov-miR-13467-3p	chr9-:112232113_112232179	0.969	GUCACUGGAAGGAUGGCCAUUCCUG	25	0.56	GGAAAUUCUGUUCUACUCGUCACAA	25	0.4	0.558	1.10204	0.390997	0.354793	no
nov-miR-6875-5p	chr20+:23097791_23097854	1.019	UUUGCCAGAUCCUUGCACGGGU	22	0.545455	CCGUGCAAGGAUCUGGCAAAGC	22	0.590909	0.735	0.574614	0.154365	0.268641	no
nov-miR-3731-3p	chr16+:87316990_87317046	0.895	GUCAAGAGUUCUGCCUGUGCAUAG	24	0.5	AUGCCGGGCCGGGAACUCACAG	22	0.681818	0.57	0.45363	0.0529324	0.116686	no
nov-miR-760-5p	chr11+:13277840_13277900	1.571	CUGUUUACCCGCGCCGGACUCA	22	0.636364	AUCCGAGUGCGGGCGCGGGC	20	0.8	0.558	0.535803	0.136918	0.255538	no
nov-miR-3721-3p	chr16+:85799677_85799741	1.76	CCGCGGCGCGGCCUUGCUCUCUU	23	0.73913	GAGGGCGGUCGCGGCGGGC	19	0.894737	0.513	1.01756	0.164661	0.16182	no
nov-miR-8606-5p	chr2-:17753270_17753330	1.293	GUCCCCAGACUCUCCCGGGCUG	22	0.727273	GCGGGGAGAGGUCUGGGGAAAG	22	0.681818	0.516	0.92817	0.340506	0.366857	no
nov-miR-2191-5p	chr13+:29893814_29893873	1.067	AUCAGAUAUGUGUGUGUGUGUG	22	0.409091	CAUAUAUAUACAUGUUACCUGACUCC	26	0.346154	0.506	0.464485	0.145614	0.313496	no
nov-miR-756-3p	chr11+:130310298_130310356	0.894	AAUUAGGCAUCAACAUGGUGACC	23	0.434783	CCACCAGGUUGCCUAAUGAG	20	0.55	0.633	2.71359	0.976219	0.359752	no
nov-miR-11982-3p	chr7+:37784899_37784959	1.134	ACCUCUCUGGGUUCUGUUUCU	21	0.47619	CAACAGAACCCAGAGAGUCAG	21	0.52381	0.726	0.523904	0.259459	0.495241	no
nov-miR-10610-3p	chr5+:71632735_71632799	0.867	UCAGGCUGCCAACAUGAUGCCUCU	24	0.541667	AUGCACGUAGUUGGCUCUUGUGA	23	0.478261	0.656	0.380516	0.101295	0.266205	no
nov-miR-991-3p	chr11+:777547_777608	1.92	GGCGGAGCCGGGUGGGACUGGGCGC	25	0.84	ACCCGGUCCGGGUCGGCUGGGCUGC	25	0.8	0.522	0.576971	0.197144	0.341687	no
nov-miR-5658-3p	chr1+:145964685_145964749	1.165	GGCUUAGAACGCCACCGACUU	21	0.571429	GUUGGUCGCGGCUUGGGCUCCG	22	0.727273	0.537	1.57205	0.452642	0.287931	no
nov-miR-9713-5p	chr3-:64268088_64268142	0.963	GAUUUUCCUGGAUCCGGAGCUG	22	0.545455	GCUGCCGCCCCAGGAAUGUUAC	22	0.636364	0.516	0.548152	0.0960013	0.175136	no
nov-miR-6931-5p	chr20+:38449437_38449501	0.761	CUGAAAGCCGUUUCCCGUGUUUGG	24	0.541667	UUCAAAUGCUGGCGCUUUCACA	22	0.454545	0.672	2.05761	0.322928	0.156943	no
nov-miR-4221-3p	chr17+:62689466_62689519	1.407	UGGGAACGGGGUGAGGGAAGCAG	23	0.652174	GAACCCUGACCCCUUCCCUGU	21	0.619048	0.536	0.437074	0.101629	0.232522	no
nov-miR-5475-5p	chr19-:45786398_45786457	1.307	GAUGACCUGGUCACCGUGUGG	21	0.619048	GCGUGGUGGCUCGAGGCCAUGGC	23	0.73913	0.528	0.900508	0.367177	0.407744	no
nov-miR-1170-5p	chr11-:17276489_17276544	1.48	CAGGAGGGACGUGGCGCUCUGA	22	0.681818	AGGAGGCCGCGCCUCUUCCUUCC	23	0.695652	0.555	1.83391	0.601388	0.327927	no
nov-miR-908-3p	chr11+:64361076_64361133	1.299	GGAGGAGCUGGGGAGGGUUUCG	22	0.681818	GCACCCCUCUUGCUCCUACCAG	22	0.636364	0.519	0.873468	0.170917	0.195676	no
nov-miR-6862-5p	chr20+:18056657_18056712	1.145	CUUGAUUUUCGAUCUGGCGACCG	23	0.521739	GUCGCCAGGUGUCCAUCGGGGC	22	0.727273	0.599	0.948124	0.283309	0.298811	no
nov-miR-7735-3p	chr22-:38244804_38244865	0.862	UUGGGCAGGUCCCAGGCAUUCCU	23	0.608696	CAAUGCCCAGGUCUGCCCUAGA	22	0.590909	0.72	1.25435	0.284374	0.226711	no
nov-miR-13565-5p	chr9-:134326468_134326532	1.811	GCGGCUGCGGUGGCGGCGGCGGCG	24	0.916667	CGGCGAGUUGUUGCAAAAGUCGCCC	25	0.6	0.561	4.00208	1.60403	0.400798	no
nov-miR-6426-3p	chr1-:182391716_182391790	1.652	AGAGUCGAGAGUGGGAGAAGAG	22	0.545455	CCUCUCCUAACCUCGCUCUCG	21	0.619048	0.615	1.42594	0.52317	0.366895	no
nov-miR-12994-3p	chr8-:27299698_27299758	0.873	AGCCCAAAGUCCAGAUUUGUCAUC	24	0.458333	UGGGAAUGAGGCUUUGGGCGAC	22	0.590909	0.587	0.43059	0.200351	0.465296	no
nov-miR-12618-5p	chr8+:144473052_144473123	2.112	GUGGGCGCCGGGGCGGGGCAGGUGU	25	0.84	CCCGGGCCCGCCCACCCGCGCCUCUU	26	0.846154	0.512	2.02215	0.330383	0.163382	no
nov-miR-13591-3p	chr9-:136941172_136941231	1.299	GCAGGGCGGGUGUGGGCAGCAGC	23	0.782609	UCACCCAGGCGCUGUUCUGCAG	22	0.636364	0.522	1.22572	0.3161	0.257889	no
nov-miR-8200-3p	chr2+:241812613_241812672	1.189	ACACAGAGUCUCUGUGGAACCC	22	0.545455	GAGGACACGGAGGCUCUGUGGA	22	0.636364	0.765	2.48503	0.883002	0.355329	no
nov-miR-2798-5p	chr14-:31026122_31026175	1.737	UUGCCGGAGGCGGUGGUGGCGG	22	0.772727	GCGGCCCCUCCCCGGCAGCAGC	22	0.863636	0.507	0.767918	0.0567206	0.0738628	no
nov-miR-8330-5p	chr2+:69175501_69175566	1.219	GUGGUCCCAGCUACUGGGGAGG	22	0.681818	AGCCCAGAAGCUGGAAACUGCAG	23	0.565217	0.503	1.98888	0.768523	0.386411	no
nov-miR-13115-3p	chr8-:94244209_94244282	1.587	CACGUAUGCGCGUGUGUGUGC	21	0.619048	ACAUAUGCGUGUGUGUGUGUGUG	23	0.478261	0.591	0.468333	0.166333	0.355159	no
nov-miR-4154-3p	chr17+:4717830_4717888	1.216	GAGGAGUAGGGUUGGGGUGUGUG	23	0.608696	CUGCCCCUACUCUGAUCCCAGG	22	0.636364	0.546	1.86819	0.665772	0.356372	no
nov-miR-3536-3p	chr16+:2762452_2762511	1.288	AGGAGAAGUGGCAGGUCACGCUCUA	25	0.56	GACGUGGCCGCUCACGCUCCAGA	23	0.695652	0.638	0.297896	0.0693034	0.232643	no
nov-miR-7577-3p	chr22+:42615327_42615393	1.395	CGGGUAAAGGUCGCCCUCAAGGUGA	25	0.6	AUGCCUGGGAGUUGCGAUCUGCCCG	25	0.64	0.56	5.91452	4.2129	0.712297	no
nov-miR-9359-3p	chr3+:9891878_9891932	1.112	UGGAGAAGUAUGGGCGGCCUGAG	23	0.608696	CUCUGCCAAUACCUUCUCCCGC	22	0.590909	0.665	0.476851	0.110848	0.232457	no
nov-miR-6182-3p	chr1+:9311293_9311355	1.008	AGCCGAGUCCUGACCCAUGACU	22	0.590909	UGAUGGGUCUCGGCGUGGCUGA	22	0.636364	0.551	0.508109	0.123454	0.242967	no
nov-miR-9028-3p	chr3+:129016475_129016558	1.423	AGGCAGGUGGAGCUCAUGGGCA	22	0.636364	CCCGUGAGCUCCACCUGCCUGC	22	0.727273	0.505	0.546851	0.0218197	0.0399006	no
nov-miR-5681-5p	chr1+:152048335_152048402	1.545	GGGCUGUGCCUGUGACUGGAG	21	0.666667	UCAGUCAGGGUCCAGCCCCG	20	0.7	0.545	0.517376	0.243332	0.470319	no
nov-miR-240-5p	chr10+:68759335_68759396	1.018	AGCCUGGAAGCUGGAGCCUGCAG	23	0.652174	CUGUACUCCAGCCUAGGCAAC	21	0.571429	0.69	1.45518	0.665251	0.45716	no
nov-miR-161-5p	chr10+:23393408_23393471	0.95	AGCCUGGAAGCUGGAGCCUGCAG	23	0.652174	CUGUACUCUAGCCUGGGCAACAG	23	0.565217	0.512	1.45518	0.664969	0.456966	no
nov-miR-6792-3p	chr1-:77960395_77960453	1.227	CAUGGUGUCCCAGGCCCCCAU	21	0.666667	CAGGGCCUGGAACUCCAAUGGG	22	0.636364	0.501	0.774864	0.273605	0.3531	no
nov-miR-1846-3p	chr12-:121004493_121004559	1.26	GACAGCGAGAGGCAGCUCUGGG	22	0.681818	CAGGGUACCCUCUCGUUGCAG	21	0.619048	0.579	0.8339	0.269701	0.323422	no
nov-miR-10739-5p	chr5-:134411811_134411881	1.606	AUCCGGUCCUCGGCUGCGGCGG	22	0.772727	GCCGCAGUGGAGGAGCUGGUUUC	23	0.652174	0.54	0.70907	0.121133	0.170833	no
nov-miR-10267-5p	chr4-:77048488_77048549	1.026	CCUGGUGACCUGUGACAAAGGA	22	0.545455	CUCUGUCCCAGGCCCAGACU	20	0.65	0.513	1.16362	0.337827	0.290325	no
nov-miR-14288-5p	chrY-:10090409_10090463	0.882	GCCUGCUUAGUACUUGGAUGCGA	23	0.521739	GAAUACUGAGUGCUGUAGGCUU	22	0.454545	0.624	5.19766	2.19376	0.422067	no
nov-miR-12842-3p	chr8-:119832807_119832867	0.953	UUCCACUUCCGCUGACGUCGGA	22	0.590909	AGAUGUCGGCGGAUGGUAGCU	21	0.571429	0.668	1.62669	0.938522	0.576953	no
nov-miR-6630-3p	chr1-:28579764_28579827	1.016	AAUAGUGAAGCUGGCCUAAAUGUU	24	0.375	CAUGUGGGCUAGUUUCAGACAGGU	24	0.5	0.595	3.1789	1.96082	0.616824	no
nov-miR-10071-3p	chr4-:105145626_105145685	0.829	UACAGAGCUAAUUCCGAAUGACGGA	25	0.44	UGACAUUCGGAGCUCUGUAAC	21	0.47619	0.814	0.37833	0.0961647	0.254182	no
nov-miR-7693-5p	chr22-:28884034_28884095	1.979	GGCGCGGGGCCCGGGCGGCGGGCA	24	0.958333	CUCGCCCUCGGCGCUGAGCGUGGC	24	0.791667	0.557	3.64403	1.24636	0.342028	no
nov-miR-14288-3p	chrY-:10090409_10090463	0.882	GCCUGCUUAGUACUUGGAUGCGA	23	0.521739	GAAUACUGAGUGCUGUAGGCUU	22	0.454545	0.624	6.16182	3.64694	0.59186	no
nov-miR-7485-3p	chr22+:24356972_24357029	1.046	CUCCCCAGUUAUGACAACCAAA	22	0.454545	UUGGUUGUCACAACUGGGGGA	21	0.52381	0.646	0.765593	0.396784	0.518271	no
nov-miR-2466-5p	chr14+:100726874_100726943	1.981	GGCGCGCGCGGCGGCGGCGGCAG	23	0.956522	GCAGCGCGCAGCCCGGUGCAGC	22	0.818182	0.525	7.86335	4.11072	0.522769	no
nov-miR-6613-3p	chr1-:247210808_247210881	1.403	CAGAAGGGCGCGGCUUCCGGGA	22	0.727273	CUCAGCUGGGUCGUCUUCUGUG	22	0.590909	0.509	0.725231	0.263106	0.36279	no
nov-miR-816-3p	chr11+:34640158_34640217	0.793	UUUGGCACUGGUUCAGGGUCA	21	0.52381	ACUGGAAUCUGAGCCUGCAUC	21	0.52381	0.534	3.76672	1.54573	0.410365	no
nov-miR-2552-5p	chr14+:19108603_19108667	1.138	GUAAUCCCAGCUACUCUGGAGGCU	24	0.541667	ACUCCGGAAGUGGAGGUUGCAG	22	0.590909	0.629	2.65696	1.4171	0.533353	no
nov-miR-2757-5p	chr14-:19291329_19291393	1.102	GUAAUCCCAGCUACUCUGGAGGCU	24	0.541667	ACUCCGGAAGUGGAGGUUGCAG	22	0.590909	0.629	2.65696	1.4171	0.533353	no
nov-miR-7447-5p	chr22+:15830932_15830996	1.138	GUAAUCCCAGCUACUCUGGAGGCU	24	0.541667	ACUCCGGAAGUGGAGGUUGCAG	22	0.590909	0.629	2.65696	1.4171	0.533353	no
nov-miR-7457-5p	chr22+:20021112_20021187	2.052	AGUCGGCGGCGGUGGCGGAGGCGGU	25	0.8	CGACUCCGCUAGUGGCCCGGCCGGCCUG	28	0.785714	0.501	1.56784	0.478439	0.305157	no
nov-miR-12906-5p	chr8-:140935319_140935395	0.926	CAGGAUAAGUCACUCUGAGGCAU	23	0.478261	GCCUUCAGUGAAUUGUAAUCCUGAU	25	0.4	0.564	0.433694	0.160905	0.37101	no
nov-miR-6426-5p	chr1-:182391716_182391790	1.652	AGAGUCGAGAGUGGGAGAAGAG	22	0.545455	CCUCUCCUAACCUCGCUCUCG	21	0.619048	0.615	1.48012	0.758864	0.512703	no
nov-miR-13987-5p	chrX+:68473247_68473331	1.129	CAUAGUGAGACCCCGUCUCUUA	22	0.5	AGAGAUGGGGUUUCACUGUCAC	22	0.5	0.537	5.94326	3.78713	0.637214	no
nov-miR-5997-3p	chr1+:26501281_26501338	0.851	GAUCAGGUUCUUGGAACCAGCC	22	0.545455	CUCAAUCUGGGGGCCAGAUCUG	22	0.590909	0.508	0.687241	0.182479	0.265524	no
nov-miR-2973-3p	chr15+:31373714_31373774	0.959	UCAAGCCGUGGUCCAGCAAACUC	23	0.565217	AGUGUUGACCCAGGCUUGUGGC	22	0.590909	0.661	0.945948	0.392903	0.415353	no
nov-miR-5029-5p	chr19+:1253363_1253427	1.356	UGGGAGGCGGUCGGUUCUGAG	21	0.666667	CAGAAACCUCCGCCACCCCCC	21	0.714286	0.533	0.427778	0.117863	0.275524	no
nov-miR-3964-3p	chr16-:75450689_75450750	1.472	GAGGUCCAGGCUGGGCUGCAG	21	0.714286	GCACUCCAGCCUGGGCCACAG	21	0.714286	0.596	0.793026	0.349356	0.440535	no
nov-miR-8058-3p	chr2+:197891113_197891172	0.836	UGUGCUAGGUGUUGGAGAUAC	21	0.47619	AUCUCCUACAUUUAGGUACUGA	22	0.363636	0.742	2.44905	0.866451	0.353791	no
nov-miR-5798-5p	chr1+:180200730_180200792	0.883	GAGAGGUAGAUCCAGGACUUGA	22	0.5	AACCCUGGAGCUGCAGUCUCUA	22	0.545455	0.558	0.420978	0.287155	0.682115	no
nov-miR-7551-3p	chr22+:39457454_39457528	2.076	GAGAGGCUGCGGCGGACGCCAG	22	0.772727	GGAGCCGCCGCCGCCGCUGCUGC	23	0.869565	0.515	0.577185	0.12055	0.208859	no
nov-miR-10117-5p	chr4-:140756301_140756351	1.926	GGAGCCGGGCUGCAGAGUGCCA	22	0.727273	GCGUCUGCGGCCGCGGGCUCUCG	23	0.826087	0.505	0.502365	0.10604	0.211081	no
nov-miR-4431-3p	chr17-:1471157_1471218	1.163	GUAGUGUCCGUGCCGGGUGCC	21	0.714286	ACCCCGGGCUGAUCACUACUG	21	0.619048	0.537	0.642437	0.179261	0.279033	no
nov-miR-391-3p	chr10-:119060016_119060072	0.919	AUUGAAGGCUAAUUAGCAGUAU	22	0.318182	AAUGCUGCCAGUCUCCUUCAGA	22	0.5	0.557	0.769471	0.385836	0.501431	no
nov-miR-5784-3p	chr1+:17592676_17592733	0.947	UGGGUCCGCAGCGUCUGGAGGAAA	24	0.625	UCCCAGAUUGCCGCAGACCUAGU	23	0.565217	0.682	1.09098	0.154933	0.142012	no
nov-miR-8705-3p	chr2-:231642196_231642258	1.101	AAGUCCAGAGGUCGAGGAUGCAGUG	25	0.56	CUGCACCCCAGCCUGGGCGACA	22	0.727273	0.569	0.638868	0.336966	0.527442	no
nov-miR-4196-3p	chr17+:57861089_57861162	1.507	UUCCUCUUCUGGCAGCGAGGG	21	0.619048	CUGCUGAGCUGGAGGAGGAGGA	22	0.636364	0.527	0.545173	0.123223	0.226026	no
nov-miR-826-3p	chr11+:404470_404534	1.044	GACAGCGGGCAGAGGGCCACAU	22	0.681818	UUGGGCCUCUCUCCACUGUAGA	22	0.545455	0.535	0.760467	0.353036	0.464235	no
nov-miR-11652-5p	chr6-:38348984_38349050	1.236	CUGUAGUCCCAGCUACUUGGGAGGC	25	0.6	AAGCCCAGAAGUUGAGGCUGCAG	23	0.565217	0.506	3.2763	2.19671	0.670484	no
nov-miR-13904-3p	chrX+:25013606_25013673	2.22	GGUGGCGGCGGAGGGGCC	18	0.888889	CCGCUGCCGCCGCCGCCGC	19	0.947368	0.556	0.978987	0.160892	0.164346	no
nov-miR-7312-5p	chr21+:32730987_32731044	0.724	UCAGGAUCAGGAUCUGCAGAGU	22	0.5	UCUGCAGAUCCUGGUCCUAGUA	22	0.5	0.818	0.476185	0.560903	1.17791	no
nov-miR-8509-5p	chr2-:130342064_130342131	1.572	GUGUCCAUGGCGGCGCUUGACCUG	24	0.666667	GGUCCUGCAGCUGCUUGGGGACCU	24	0.666667	0.512	0.782931	0.214205	0.273593	no
nov-miR-11845-5p	chr7+:135675963_135676023	1.271	UGCCCAGGCUGGAGUGCAGUGG	22	0.681818	ACUGCAACUCCUGCCUCCCGGUCCA	25	0.64	0.634	3.0331	2.16041	0.712277	no
nov-miR-9167-3p	chr3+:186787299_186787359	0.778	AAAGCAGGAUUCAGACUACAAU	22	0.363636	UGUUGUCGUUCCCCCUGCUUAA	22	0.5	0.66	0.28793	0.108602	0.377181	no
nov-miR-9356-5p	chr3+:97877673_97877733	1.02	AAGGAGAUCUGAGAGCUGGAAGU	23	0.478261	UUCCAGUUGCCAGAUCCUUCCAU	23	0.478261	0.568	0.370798	0.181898	0.490558	no
nov-miR-7373-3p	chr21+:8219497_8219552	1.37	UCGACCGGCGGGCCUUCUCCA	21	0.714286	UAGGAGUGCCCGUCGGGACGAAC	23	0.652174	0.598	0.482099	0.582067	1.20736	no
nov-miR-7376-3p	chr21+:8446767_8446822	1.37	UCGACCGGCGGGCCUUCUCCA	21	0.714286	UAGGAGUGCCCGUCGGGACGAAC	23	0.652174	0.598	0.482099	0.582067	1.20736	no
nov-miR-9824-5p	chr4+:139176871_139176935	1.96	GGGCGCGGAGGGAGGCGGCGGC	22	0.909091	CGCCGCGCCCUUCGCGCUCCC	21	0.857143	0.561	0.57819	0.23905	0.413444	no
nov-miR-5670-5p	chr1+:149928394_149928449	0.947	UGGAUGGGAUCGGAGCUCUAGA	22	0.545455	UAGAACACUCUGGCCCCAUCUGC	23	0.565217	0.57	0.701948	0.32362	0.461031	no
nov-miR-11921-5p	chr7+:23667594_23667651	1.055	CGUCCAGGUUGGAGUGCAGUGG	22	0.636364	ACUGCAACCUCCACCUCCUGGG	22	0.636364	0.593	1.42648	0.952325	0.667607	no
nov-miR-11921-3p	chr7+:23667594_23667651	1.055	CGUCCAGGUUGGAGUGCAGUGG	22	0.636364	ACUGCAACCUCCACCUCCUGGG	22	0.636364	0.593	1.29958	0.580312	0.446539	no
nov-miR-570-3p	chr10-:71962613_71962688	1.231	AGGGCCUUGUCCAGAAUAGAGG	22	0.545455	UCUAUUCCAGACAAGGCCUGCA	22	0.5	0.523	0.409961	0.159602	0.389309	no
nov-miR-1114-3p	chr11-:123058076_123058125	0.88	CACCAGAAUUCAAGGUGUUGG	21	0.47619	CUUCCUUGGAUGUCUGAGUGAC	22	0.5	0.616	4.27685	3.42367	0.800513	no
nov-miR-2944-5p	chr14-:95533566_95533628	0.91	AUCUGUAGUCUUGGAGCCGCACA	23	0.521739	CUCGAGCACACCAGACUUGCAGAAAA	26	0.5	0.558	4.54166	3.28239	0.72273	no
nov-miR-14044-3p	chrX-:110198350_110198410	0.736	UUUCCGUUGCCAUGGUGAAGCUU	23	0.478261	GAUCAUCAUGGUAACGGGUAGA	22	0.454545	0.858	0.651724	0.362693	0.556514	no
nov-miR-7332-5p	chr21+:37156074_37156131	1.062	UCACCCAGGCUGGAGUGCAGUGG	23	0.652174	UCACUGUAGCUUUGAAGUCCUGG	23	0.478261	0.643	3.45127	2.82821	0.819469	no
nov-miR-4208-3p	chr17+:59677126_59677177	0.82	AGAGAUCCACAUCUGGCCUGU	21	0.52381	AACGUGGCCAAUGUGAUCUGG	21	0.52381	0.526	0.474872	0.571922	1.20437	no
nov-miR-1512-3p	chr12+:124011792_124011851	0.814	AAGAUUCCAGGGGCUCAAAAA	21	0.428571	UGAGAGCCCCUUGGAAUGUUGA	22	0.5	0.771	0.295345	0.157014	0.531629	no
nov-miR-6543-5p	chr1-:226425439_226425504	0.866	ACUCCCGUUCUGAUCAGUAGUGG	23	0.521739	ACCGUACUGCAGAAUGGGCAACA	23	0.521739	0.608	4.25936	3.10176	0.728222	no
nov-miR-7399-5p	chr21-:32377261_32377324	0.943	AUGCAUGGGUUUGGAUUUAUGA	22	0.363636	UCUCAUAGUACCCCAUGCCAGA	22	0.5	0.536	0.480571	0.504909	1.05064	no
nov-miR-1611-5p	chr12+:47904140_47904198	1.005	UGUGAGAAGGGUCUGGGCUUGG	22	0.590909	CAGCCCAGGCUAGGUCUCAGA	21	0.619048	0.695	0.45805	0.128081	0.279623	no
nov-miR-7576-5p	chr22+:42527812_42527866	0.856	UAGUCCAGGCUAGAGUGCAGUG	22	0.545455	CUCACUGUAGCCUCGAUAUCC	21	0.52381	0.605	0.926988	0.524717	0.566045	no
nov-miR-2827-3p	chr14-:52695516_52695577	1.581	GCCGGCCCGCACGGGCUUCAUCU	23	0.73913	ACCGAGCGUGCGGACUGGCCU	21	0.714286	0.508	0.720149	0.368605	0.511846	no
nov-miR-6444-3p	chr1-:192692872_192692930	1.105	AAUUUGGGAGGGGCCAGGGGUG	22	0.636364	CUGUGUCCCCACCCAAAUCUC	21	0.571429	0.592	0.38433	0.273233	0.710932	no
nov-miR-68-3p	chr10+:119224036_119224098	0.985	CUGUAGUCCCAGCUACUCCCAAG	23	0.565217	CAGGAGUUCUGGGCUGCAGUG	21	0.619048	0.569	1.22245	0.649452	0.531271	no
nov-miR-9247-3p	chr3+:42590868_42590929	1.123	UGGCGGUCGUGGUUCCGGAGGU	22	0.681818	CUUCGUACCGGACUGGCUGAG	21	0.619048	0.632	0.744594	0.478858	0.643113	no
nov-miR-4007-5p	chr16-:88705439_88705496	1.384	UCUCCUGGCGGGGAGCUGUGCUC	23	0.695652	GCUGCCAGCCCCGUUGGGAGGAA	23	0.695652	0.594	0.966645	0.689427	0.713216	no
nov-miR-11928-5p	chr7+:2596179_2596243	1.237	AGCCCAGGAGGUGGAGGCUGCAG	23	0.695652	UGCACUCCAUCCCGGGCCACAGA	23	0.652174	0.521	0.677167	0.60214	0.889204	no
nov-miR-11028-5p	chr5-:9546010_9546065	1.642	AAGGCGGCGCCGGUGGCGGCU	21	0.809524	CCGCUCCCGAGCGCUGCUUUCC	22	0.727273	0.571	0.478024	0.143632	0.30047	no
nov-miR-1648-3p	chr12+:55891407_55891471	1.269	CUGUAGUCUCGGCUGCUCAGGA	22	0.590909	AGCCCAGGAGGUUGAGGCUGCAG	23	0.652174	0.571	1.50216	1.28473	0.855259	no
nov-miR-8205-3p	chr2+:25994956_25995020	0.919	GAGCUCUGUGAUGAGUGUGUAUCCUC	26	0.5	GGAUUGCACGGAGGAGCUCUU	21	0.571429	0.625	0.235731	0.414352	1.75773	no
nov-miR-8339-3p	chr2+:70086842_70086895	1.93	CGGCAGGCGGCCGUGAGUGGGU	22	0.772727	CCACCGGCCGCCGCCGGG	18	0.944444	0.544	2.25304	1.02519	0.455027	no
nov-miR-9859-5p	chr4+:158700696_158700755	0.917	UAUACUUUCAGGGAUCAUUUCUCU	24	0.333333	AGAAGUUUCUCUGAAGGUGUAGC	23	0.434783	0.823	0.292597	0.484763	1.65676	no
nov-miR-2186-5p	chr13+:27261909_27261972	1.21	UCACCCAGGCUGGAGUGCAGUG	22	0.636364	CUGCAGCCUCGAAUACCUGGGCUCGA	26	0.615385	0.513	3.971	2.68886	0.677125	no
nov-miR-8167-3p	chr2+:235598061_235598119	1.522	GGGUGGAGCGUGCACGCGCUCC	22	0.772727	AGCGUGCACGCCCUCCCAU	19	0.684211	0.583	0.80168	0.364429	0.454581	no
nov-miR-3729-3p	chr16+:8674591_8674645	1.508	AGUCCGGCGAGUCGCUGGGGGA	22	0.727273	ACCCAGCGCUGCCGGAACUCG	21	0.714286	0.535	0.637209	0.488753	0.767022	no
nov-miR-6778-5p	chr1-:64941088_64941142	1.241	CCCAGGCUGGAGUGCAGUGGC	21	0.714286	CACUGCAACCCCUGCCUUGCA	21	0.619048	0.502	2.4472	2.04164	0.834277	no
nov-miR-9928-5p	chr4+:3228557_3228613	1.257	CCACCAGGAGCCUGGCACUGUG	22	0.681818	CAGUGCCCCGUUUCUGUGGCA	21	0.619048	0.5	0.791102	0.699622	0.884364	no
nov-miR-23-3p	chr10+:103060057_103060118	1.141	AGCCCAGGUGUUGGAGGCUGCAG	23	0.652174	CUGUACUCCAGCCUGGGCGAC	21	0.666667	0.621	1.67535	1.35517	0.808886	no
nov-miR-4460-5p	chr17-:19190179_19190240	0.751	UAUACUUUCAGGGAUCAUUUCU	22	0.318182	AAGUUUCUCUGAACGUGUAGAGC	23	0.434783	0.807	0.300404	0.690099	2.29724	no
nov-miR-4044-5p	chr17+:19188021_19188082	0.872	UAUACUUUCAGGGAUCAUUUCU	22	0.318182	AAGUUUCUCUGAACGUGUAGAGC	23	0.434783	0.715	0.300404	0.690099	2.29724	no
nov-miR-7811-5p	chr22-:50623472_50623530	0.96	UAGGUCGAGGCUGUAGUGAGC	21	0.571429	CACUCCAGCCUCGGGGACAGAG	22	0.681818	0.65	0.356605	0.404884	1.13539	no
nov-miR-23-5p	chr10+:103060057_103060118	1.141	AGCCCAGGUGUUGGAGGCUGCAG	23	0.652174	CUGUACUCCAGCCUGGGCGAC	21	0.666667	0.621	0.224278	0.448674	2.00053	no
nov-miR-1374-3p	chr11-:78521201_78521262	0.909	AGCCCAGGAGUUGUAGACUGCA	22	0.545455	CACUACACUCCAGCCUGGGCAAC	23	0.608696	0.628	1.01625	0.714713	0.703286	no
nov-miR-13600-5p	chr9-:14078338_14078401	1.041	CUGUAGUCCCAGCUACUCAGGA	22	0.545455	UUGGGAAGUUGAGACUGCAGU	21	0.47619	0.615	2.02623	1.7182	0.84798	no
nov-miR-11883-5p	chr7+:150435046_150435103	0.72	UGUUGCCCAGGCUGGAGUGCAG	22	0.636364	UUACUGUAGCCUGGGCUCAAC	21	0.52381	0.829	4.08896	3.03878	0.743168	no
nov-miR-6951-3p	chr20+:416909_416970	0.99	AGCCCAGGAGGUUGAUACUGCAG	23	0.565217	ACUGCACUCCAGCCUGGGCCAC	22	0.681818	0.55	1.2651	0.918864	0.726315	no
nov-miR-4043-5p	chr17+:19061916_19061976	0.934	CUAUACUUUCAGGGAUCAUUU	21	0.333333	AAGUUUCUCUGAACGUGUAGA	21	0.380952	0.768	0.300404	0.685948	2.28342	no
nov-miR-4457-5p	chr17-:19064072_19064132	0.858	CUAUACUUUCAGGGAUCAUU	20	0.35	AAGUUUCUCUGAACGUGUAGA	21	0.380952	0.549	0.300404	0.66112	2.20077	no
nov-miR-8070-3p	chr2+:203171526_203171585	0.933	ACCCAGGAGCUUGAGGCUGUAA	22	0.545455	ACUGCACUCCAGCCUGGGUGA	21	0.619048	0.578	0.959598	0.943077	0.982783	no
nov-miR-9457-3p	chr3-:133840374_133840436	0.929	GCCUGGGUUCACAUGGCCUGA	21	0.619048	AGGCUGUGUGAAACUGAGGCUU	22	0.5	0.744	4.37907	2.86902	0.655168	no
nov-miR-13396-5p	chr9+:88374273_88374335	0.813	CUAUACUUUCAGGGAUCAUUUCU	23	0.347826	AAGUUUCUCUGAACGUGUAGAGC	23	0.434783	0.766	0.307804	0.755293	2.45381	no
nov-miR-11716-5p	chr6-:68665179_68665241	0.892	CUAUACUUUCAGGGAUCAUUUCU	23	0.347826	AAGUUUCUCUGAACGUGUAGAGC	23	0.434783	0.731	0.307804	0.755293	2.45381	no
nov-miR-353-3p	chr10-:103718043_103718104	0.759	AAGCCCAGAGUUUGAGGUUACA	22	0.454545	ACUGCACUCCAGCCUGGGCAAC	22	0.636364	0.814	2.18074	1.78873	0.820241	no
nov-miR-8253-3p	chr2+:42092538_42092627	1.228	AGUGGCCAAAGUACAAACAUUU	22	0.363636	AUGUUUGUACUCCGGCCGCUGC	22	0.590909	0.595	0.489077	0.664292	1.35826	no
nov-miR-3534-3p	chr16+:27563982_27564045	0.957	GAGCCCAGUAGGUCGAGACUGC	22	0.636364	ACUGCACUCCAGCCUGGGCAAC	22	0.636364	0.552	2.22368	1.83362	0.824589	no
nov-miR-5527-5p	chr19-:55225487_55225541	1.023	UGAGGAGGAUCUGAAGGAUUGG	22	0.5	GAAACCUCCACUUCCUCCUCAUC	23	0.521739	0.582	0.342712	0.399109	1.16456	no
nov-miR-1004-3p	chr11+:86064577_86064629	1.025	AGUCAAGGCUGCAGUGAGAUG	21	0.52381	ACUGCACUCCAGCCUGGGCAAC	22	0.636364	0.523	2.16293	1.79432	0.829581	no
nov-miR-6931-3p	chr20+:38449437_38449501	0.761	CUGAAAGCCGUUUCCCGUGUUUGG	24	0.541667	UUCAAAUGCUGGCGCUUUCACA	22	0.454545	0.672	0.499985	0.419365	0.838754	no
nov-miR-13466-3p	chr9-:112180127_112180192	0.961	UUGCCCAGAAGUUGAAAGUUGCAG	24	0.458333	UGCAUUCCAGCCUGGGCGACAGA	23	0.608696	0.508	1.29646	1.28995	0.994983	no
nov-miR-2918-3p	chr14-:90497217_90497278	1.126	AGCCUAGGAACUGGAGGCUGCAG	23	0.608696	CUGCACUCCAGCCUGGGUGAC	21	0.666667	0.634	1.02242	0.916382	0.89629	no
nov-miR-11214-5p	chr6+:170290402_170290469	1.396	GGCGGCGGCGACUUUCGUUUUCCU	24	0.625	GUGAGGGUCGCCGGCUUCCUG	21	0.714286	0.51	0.726104	0.752936	1.03695	no
nov-miR-10175-3p	chr4-:183061257_183061330	1.194	AGGCCCAGAGCUUGAGACUGCAGU	24	0.583333	ACUGCACUCCAGCCUGGGCAACA	23	0.608696	0.581	2.05834	1.77638	0.863014	no
nov-miR-286-5p	chr10+:79614620_79614682	1.149	CUGGCACUCUGAGGUCUCUGUGGC	24	0.625	CAUGAGGUUAGAAGGCCAGGU	21	0.52381	0.514	0.777612	0.641104	0.824453	no
nov-miR-3014-3p	chr15+:49155877_49155931	1.035	UUCCAGCCUCCUGGGUAAAGG	21	0.571429	CUUGCUUGGGACUCUGGACGC	21	0.619048	0.515	0.721969	0.986058	1.36579	no
nov-miR-12391-3p	chr7-:44383380_44383439	0.827	UGCACUGGGCAAGAUCUCAAUACA	24	0.458333	UAAGAUUUUGACCAGUGGGGA	21	0.428571	0.72	0.401091	0.590791	1.47296	no
nov-miR-10290-5p	chr4-:84687742_84687805	0.879	AUUCCCAUGCUGAUCAGUGGUGG	23	0.521739	UGCACUCCAGCCUGGGAAACA	21	0.571429	0.545	0.618947	0.340221	0.549677	no
nov-miR-6311-3p	chr1-:150615443_150615512	1.225	AGCCCAGGACGAGACUGCAGUG	22	0.636364	CUGCACUCCAGCCUGGGCAAC	21	0.666667	0.601	1.63467	1.37518	0.84126	no
nov-miR-12926-3p	chr8-:143973502_143973563	1.73	GGCCUCUUUAAGCGGCGCGCGCGGC	25	0.76	CGCCGGGUGCUGGAGGCUCC	20	0.8	0.514	1.60699	1.17653	0.732131	no
nov-miR-4905-3p	chr18-:11622603_11622666	1.088	AGAAGGGCAGAGGGAAUCCCACAC	24	0.583333	GUGCAUUUCUCUCCCUUCUAA	21	0.428571	0.526	0.540204	0.539275	0.99828	no
nov-miR-5319-3p	chr19+:909499_909564	1.172	GCUUCAAGACCAGGGUGCCAGG	22	0.636364	CCCAGCACUUUGGGAGGCCGAG	22	0.681818	0.62	1.43095	1.24356	0.869043	no
nov-miR-7401-5p	chr21-:32612312_32612372	1.357	GGGAUUCCGGACUGUGAGCGGC	22	0.681818	UGCUGGCGAUCCGGCGACCCUC	22	0.727273	0.556	0.612563	0.917993	1.49861	no
nov-miR-8092-3p	chr2+:209323843_209323898	0.871	GGCCUCCAAUUGGUUACACCCU	22	0.545455	CCUAUGACCAAUCAGAGGCUGA	22	0.5	0.587	0.302854	0.694634	2.29363	no
nov-miR-1867-5p	chr12-:124234031_124234094	0.871	UAGUGGGCCACUUUUGUUAAG	21	0.428571	AGUGUUUAGUGGUCCACUGUAGA	23	0.434783	0.552	1.7482	1.1592	0.66308	no
nov-miR-10940-3p	chr5-:53647249_53647309	0.885	AUCCCAGAGUUCAGGGCUGCAGUGA	25	0.56	ACUGCACUCCAGCCUGGGCAAG	22	0.636364	0.644	1.04173	0.940956	0.903267	no
nov-miR-6864-5p	chr20+:18507839_18507898	1.174	UUUGAUUGGCCAGUGGACAGCG	22	0.545455	CUGGGGCGCUGGCCAAUCGGUUG	23	0.695652	0.627	0.547044	1.16036	2.12115	no
nov-miR-6650-5p	chr1-:32556443_32556507	1.285	GUGGUCCCAGCUACUUGGGAGGC	23	0.652174	GGCCCAGGAGUUGGAGGCUGCAG	23	0.695652	0.519	0.444108	0.414526	0.93339	no
nov-miR-12307-3p	chr7-:1769000_1769056	0.798	GGUCUCCGAUUGGUUACCCAC	21	0.571429	CUUUGACCAAUCAGAGGCUGA	21	0.47619	0.806	0.270375	0.695814	2.57352	no
nov-miR-13117-3p	chr8-:95299979_95300034	0.698	GGCCUCCAAUUGGUUACACCCU	22	0.545455	CCUGUGACCAAUUAGAGGCUGA	22	0.5	0.845	0.270375	0.682299	2.52353	no
nov-miR-11141-3p	chr6+:144593380_144593444	1.005	GGCCUCCAAUUGGUUACAACAC	22	0.5	CCUGUGACCAAUCAUAGGCUGA	22	0.5	0.567	0.270375	0.682069	2.52268	no
nov-miR-116-3p	chr10+:12970658_12970716	0.861	UGGGGAUCACCUGAGGCCAAG	21	0.619048	UGGCCAGCAUGGUGAAACCCUGU	23	0.565217	0.571	0.293068	0.434242	1.48171	no
nov-miR-11254-5p	chr6+:28710589_28710652	1.313	GGGGGUGUAGCUCAGUGGUAGA	22	0.590909	GGCCCUGGGUUCAAUCCCCAG	21	0.666667	0.515	5.15464	5.81412	1.12794	no
nov-miR-13729-3p	chr9-:90945183_90945238	1.027	CGCCUCCAAUUGGUUGCACCCC	22	0.636364	CCUGAGACCAAUCAGAGGCUGA	22	0.545455	0.576	0.270375	0.691771	2.55856	no
nov-miR-9694-3p	chr3-:57556001_57556063	1.276	AUGCCCUCCAAGCCGGAAGUGGAU	24	0.583333	CCGCUUCGUUGGAGGAGGUGG	21	0.666667	0.507	0.374649	0.560326	1.4956	no
nov-miR-7855-5p	chr2+:111135385_111135446	1.165	UUGUGUCCAGUUGUUGGGGGAG	22	0.545455	CCCUCAGCCACUGCUGACACCAGG	24	0.666667	0.504	0.361209	0.680544	1.88407	no
nov-miR-5434-5p	chr19-:37385013_37385072	1.063	GGGAGGAUCGCUUGAGCCCAG	21	0.666667	GGGCAACACAGUGAGACCUCGU	22	0.590909	0.5	2.61076	2.31394	0.88631	no
nov-miR-10531-3p	chr5+:179836475_179836560	1.281	UGUCCAUGGGCUUCUCUGAUGAA	23	0.478261	CAUCGGAGCGGCUCUGGACACC	22	0.681818	0.515	0.23319	0.465405	1.99582	no
nov-miR-9448-5p	chr3-:131479169_131479233	1.184	GGGCAUACUCGUAGACCUUGCCUG	24	0.583333	GGCAGGGGGGACAGUGUAUGCAAGA	25	0.6	0.52	0.304524	0.481349	1.58066	no
nov-miR-1510-3p	chr12+:123616776_123616837	0.763	UUUGAAAUGGUUUGAGGCCUUGC	23	0.434783	AAGGUUAUAGAAAUUUCAGACA	22	0.272727	0.636	1.06326	1.60443	1.50897	no
nov-miR-7500-3p	chr22+:28819990_28820049	0.761	CCUGGGGUCCAGUAUGAGCUU	21	0.571429	GCUCAUACCUGUAAUCCCAGCA	22	0.5	0.787	0.418001	0.508778	1.21717	no
nov-miR-8110-5p	chr2+:218427731_218427819	0.928	UAAGGUUGCUCUCACUGUCAGG	22	0.5	UGACAGUGAGUGACUCCCUAAA	22	0.454545	0.513	0.152433	0.430775	2.82599	no
nov-miR-10345-3p	chr5+:127229454_127229515	1.847	GGUCGAGGCCUCCCGGGCAGGCCUGG	26	0.807692	AGGCCUGCCUGCGGGAGACCCG	22	0.772727	0.573	0.523208	0.391362	0.748004	no
nov-miR-3906-5p	chr16-:58559869_58559931	0.865	AAGCACUGCCUUUGAACCUGA	21	0.47619	ACGGGCCAAGCAACAGUGCUAG	22	0.590909	0.536	3.34051	4.02679	1.20544	no
nov-miR-12599-3p	chr8+:141946531_141946587	0.953	GAGGAGGUUGAGACUGUAGUGAG	23	0.521739	CACUGCACUCCAGCCUGAGGAU	22	0.590909	0.551	0.4716	0.3941	0.835666	no
nov-miR-6367-3p	chr1-:160342486_160342545	0.911	UGAAUUUCAGGUAAACAAUGAA	22	0.272727	CGUUGCUUACCAGAAGUUCAAA	22	0.409091	0.673	0.420225	0.392957	0.935111	no
nov-miR-1586-5p	chr12+:32320237_32320297	1.155	GGCUCUCACCUGUAAUCCCAGCACU	25	0.56	GGCAGGAUUGCAUGAGGCCAG	21	0.619048	0.645	0.216728	0.392906	1.81289	no
nov-miR-12714-3p	chr8+:6522838_6522892	0.926	GCAGGUGGCAGGGGCAGAAUAC	22	0.636364	UUUCUGACUCUGAAAUCUGCUU	22	0.363636	0.527	4.82142	3.89569	0.807997	no
nov-miR-7155-3p	chr20-:3943065_3943125	1.015	CAAGGUCUCUCGCCGGGCUGGG	22	0.727273	CCCAGCACUUUGGGAGGCCAAG	22	0.636364	0.512	0.707123	1.02544	1.45016	no
nov-miR-6693-5p	chr1-:39344197_39344255	0.788	GGGUUUCACCAUGUUGGCCAGG	22	0.590909	UGAACUUCAGGUGAUCCUCCCG	22	0.545455	0.562	3.04351	3.77876	1.24158	no
nov-miR-444-5p	chr10-:18688455_18688513	0.985	GGGUUUCACCAUGUUGGCCAGG	22	0.590909	UGACCUCAGGUGAUCCGCCCCC	22	0.681818	0.612	2.54061	3.20415	1.26117	no
nov-miR-6255-3p	chr1-:119571598_119571652	1.077	GCCAGAAUGUGGGCCCAGGCUAUG	24	0.625	UAGACUGGGUUGACUCUGGAGA	22	0.5	0.599	0.102452	0.43219	4.21846	no
nov-miR-8330-3p	chr2+:69175501_69175566	1.219	GUGGUCCCAGCUACUGGGGAGG	22	0.681818	AGCCCAGAAGCUGGAAACUGCAG	23	0.565217	0.503	1.00526	1.73654	1.72746	no
nov-miR-8331-5p	chr2+:69175544_69175605	0.989	AGCCCAGAAGCUGGAAACUGCAG	23	0.565217	CUGCACUCUAGCCUGGGCAAC	21	0.619048	0.625	1.00526	1.73654	1.72746	no
nov-miR-6650-3p	chr1-:32556443_32556507	1.285	GUGGUCCCAGCUACUUGGGAGGC	23	0.652174	GGCCCAGGAGUUGGAGGCUGCAG	23	0.695652	0.519	0.256825	0.674822	2.62755	no
nov-miR-13269-5p	chr9+:15425409_15425466	0.845	GGGUUUCACCAUGUUGGCCAGG	22	0.590909	UGACCUCAUGUGAUCUGCCCAA	22	0.5	0.544	3.29629	4.07091	1.235	no
nov-miR-1824-5p	chr12-:116305894_116305951	1.075	AGUGGCUCACACCUGUAAUCCCA	23	0.521739	CCAAGACAGGAGGAGCCCCUGC	22	0.681818	0.502	0.455401	0.48532	1.0657	no
nov-miR-5012-3p	chr19+:10619605_10619706	1.159	UGGGAUUACAGGCGUCAGCCAC	22	0.590909	GGCUCACACCUGUAAUCCCAGC	22	0.590909	0.629	0.455401	0.501997	1.10232	no
nov-miR-5101-3p	chr19+:34234454_34234514	0.906	AUGUGGUUAUAGGAUAUGAGC	21	0.380952	GGCUCACACCUGUAAUCCCAG	21	0.571429	0.629	0.455401	0.499879	1.09767	no
nov-miR-12680-5p	chr8+:41578202_41578263	1.57	AGCUUGGGCCCGCGGCGGCGG	21	0.857143	GUCGCCGCGGGAUUUGGAGCUGC	23	0.695652	0.506	0.644145	0.612322	0.950596	no
nov-miR-6373-3p	chr1-:1613427_1613503	1.179	UCUGCCUUCUGAAGUGCUGGGA	22	0.545455	CCAGCAGUUUGGGAGGCUGAGG	22	0.636364	0.691	0.371024	0.349144	0.941028	no
nov-miR-5460-3p	chr19-:41775182_41775246	1.108	AAACACUUGGCCUCGGCUGGG	21	0.619048	CCCAGCACUUUGGGAGGCCAAG	22	0.636364	0.53	0.632504	0.956631	1.51245	no
nov-miR-10822-5p	chr5-:154918811_154918871	0.778	GGGUUUCACCAUGUUGGCCAGG	22	0.590909	UGGCCUCAAGUGAUCCACCCCA	22	0.590909	0.595	2.70361	3.6814	1.36166	no
nov-miR-2233-5p	chr13+:54621166_54621227	0.905	AGAGGGACCAGAACAUACUGUG	22	0.5	CAGUAUGUUCUGGUCCCUCUGG	22	0.545455	0.864	0.0870494	0.354603	4.07359	no
nov-miR-11620-5p	chr6-:28658244_28658308	1.183	GGGGAUGUAGCUCAGUGGUAGA	22	0.545455	GGUCCCGGGUUCGAUCCCCAGC	22	0.727273	0.514	5.63894	6.80017	1.20593	no
nov-miR-1407-3p	chr11-:93733470_93733528	0.969	CUGUGGUUUUACUUUACUCACAGGA	25	0.4	CUGUGGGAAGGAAUUACAAGAC	22	0.454545	0.546	1.03621	1.63043	1.57346	no
nov-miR-3660-5p	chr16+:6938685_6938750	0.859	CCAUGUUGGCCAGGCUGGUCUCG	23	0.652174	UGAAACCAGUUUGGCUGUCAGG	22	0.5	0.717	1.85272	2.65781	1.43454	no
nov-miR-1404-3p	chr11-:93730516_93730577	0.66	GUUCUCUAUAGGAAGCCAUAGC	22	0.454545	UAUGUUUUCCUGAGGAGAUAUA	22	0.318182	0.739	0.21472	0.464513	2.16334	no
nov-miR-1735-3p	chr12+:89455255_89455315	1.217	AACCCAGGAACUGGAGGCUGCAG	23	0.608696	CUGCACUUCAGCCUGGGUGA	20	0.6	0.587	0.28144	0.439523	1.56169	no
nov-miR-1058-5p	chr11-:103409644_103409697	0.977	CUGGUGAUAGCUGGUUGUCCAAG	23	0.521739	UAGACAACUCCCUAUACCAGAU	22	0.409091	0.524	2.56112	3.22918	1.26085	no
nov-miR-9275-3p	chr3+:49499315_49499391	0.91	ACUGGGGAGUUCAAGGCUGGUGA	23	0.565217	ACUAGCCUGGGCAACAUAGUGA	22	0.5	0.561	0.664122	0.711853	1.07187	no
nov-miR-10482-5p	chr5+:168668959_168669037	0.868	GGGUUUCACCAUGUUGGCCAGG	22	0.590909	UGGCCUUCAUCGUGACAAUGUUG	23	0.478261	0.66	2.24112	3.18803	1.42252	no
nov-miR-12444-5p	chr7-:69332610_69332670	0.887	UAUUCUGAUUUUUUGGUCACCC	22	0.363636	CCUACCAGGGUUCGGGAUAAU	21	0.52381	0.534	0.0658376	0.644518	9.78952	no
nov-miR-9729-5p	chr3-:7071078_7071138	0.836	CCCUGAUGAGCUUGACUCUAG	21	0.52381	GGAGUUUUGUUCACCUCAGAAAGGGA	26	0.461538	0.533	4.59977	4.3015	0.935156	no
nov-miR-2836-3p	chr14-:54409809_54409875	1.031	UCUGCCACCAGGUUGGAGUGCA	22	0.590909	CACUCCAGCCUGGAUGACAGAGC	23	0.608696	0.753	0.422432	0.685944	1.6238	no
nov-miR-5014-5p	chr19+:10746151_10746209	0.884	AGGUUUCACCAUGUUGGCCAGG	22	0.545455	UGGACCUCAGGUGAUCCACCCAC	23	0.608696	0.607	2.2501	3.25412	1.44621	no
nov-miR-11088-5p	chr6+:125602437_125602495	0.865	GGGUUUCACCAUGUUGGCCAG	21	0.571429	GACCUCAGGUGAUCCACCCAA	21	0.571429	0.64	2.33532	3.46474	1.48363	no
nov-miR-14226-5p	chrX-:65906368_65906425	0.895	GGGUUUCACCAUGUUGGCCAG	21	0.571429	GGCUUCAGGUGAUCCACCCAU	21	0.571429	0.716	1.02441	2.04545	1.9967	no
nov-miR-1406-3p	chr11-:93731042_93731100	0.697	AUGGUCAUUACCAAGGCUUUU	21	0.380952	UUGCUGUGGACAUGACCAUAA	21	0.428571	0.569	0.315254	0.784143	2.48733	no
nov-miR-6179-5p	chr1+:90657901_90657966	0.959	GCCAUUGAUGAUCGUUCUUCUCU	23	0.434783	AGAGGACACAGUCUGAGUGGUUC	23	0.521739	0.539	1.68653	2.12646	1.26085	no
nov-miR-5190-3p	chr19+:48965321_48965376	1.159	UCCCGCGGGUCUGUCUCUUGC	21	0.666667	CGGAACAGAUCCGGGGACU	19	0.631579	0.546	0.30354	0.829628	2.73317	no
nov-miR-13711-3p	chr9-:7967922_7967977	1.356	AGAGCCCACAUUCCUAACCACC	22	0.545455	UGGUUAGGAAUGUGGGAUCUGG	22	0.5	0.599	0.521679	1.05298	2.01845	no
nov-miR-946-5p	chr11+:69382653_69382740	0.925	CUGGAUGACCCUGACAAGCUGU	22	0.545455	AGCUUGUCAAGAUCAUCCAGCU	22	0.454545	0.618	0.734264	1.89669	2.58311	no
nov-miR-6106-5p	chr1+:52824271_52824344	0.953	CUCUGGAGUAGCUGGAACUACA	22	0.5	UAGUGGCCAGAUACUUCUGAGUC	23	0.478261	0.549	0.230786	0.562457	2.43714	no
nov-miR-11108-3p	chr6+:132817287_132817345	0.768	AAGCCAUGUUACGAGCCUUAAG	22	0.454545	UAAGGUCCCUGAGAAUGGCUAUA	23	0.434783	0.638	0.657012	1.42509	2.16905	no
nov-miR-10155-3p	chr4-:159507392_159507453	0.762	UCUACUUUCAGGGAUCACUUCU	22	0.409091	AAGUUUCUCUGAAAGUGUAGAGC	23	0.391304	0.815	0.0595774	0.502793	8.43932	no
nov-miR-1977-5p	chr12-:46188372_46188432	0.796	ACUGCCACUGCUGAAUCAGAG	21	0.52381	UGGCUCUGAUUUCCUGGCAGCU	22	0.545455	0.665	0.263937	0.671044	2.54244	no
nov-miR-6887-3p	chr20+:2655032_2655089	1.094	UGUGGGUAGAACCAUGUGGGCUG	23	0.565217	GGCCUCCUGGUGCUUACCACAGG	23	0.652174	0.508	0.192396	0.368888	1.91734	no
nov-miR-9492-3p	chr3-:153199900_153199960	1.069	AGGAUUGCUCAAGCCCAGGAGUUCU	25	0.52	GAGUUCUGGGCUGUAGUGCGCU	22	0.590909	0.604	7.11946	8.19601	1.15121	no
nov-miR-4054-3p	chr17+:21039926_21039991	1.44	UGGGCUCAGUGGCUCUGGCCUG	22	0.681818	GGAGGAUGGCUUGAGUCCAGG	21	0.619048	0.517	1.08881	1.39369	1.28001	no
nov-miR-5010-5p	chr19+:10503377_10503431	1.556	AGGGCGCGGCGGGAAAGGAGCG	22	0.772727	CCCUUCCCGCAGGUGCCCGGC	21	0.809524	0.506	0.332813	0.411638	1.23684	no
nov-miR-8116-5p	chr2+:219245520_219245602	1.678	CAGGUCAGUCCGGCAGUGCAGA	22	0.636364	GGCCCUGCCAGGAGUGGGCCUGAG	24	0.75	0.516	0.291715	0.810131	2.77714	no
nov-miR-1260-3p	chr11-:59214605_59214685	1.215	UGCAUGACUGCAGUCCCAGAUUCCU	25	0.52	GAGUUCUGGGCUGUAGUGUGCU	22	0.545455	0.586	1.8672	2.33831	1.25231	no
nov-miR-990-3p	chr11+:77604149_77604215	1.228	UCACCCAGGCUUGAGGGCAGCGG	23	0.695652	ACUGUGCUUGAACUCCUGGGCACA	24	0.541667	0.538	0.238816	0.504333	2.1118	no
nov-miR-7707-3p	chr22-:31981345_31981412	0.941	UGCAUACCUGUAGUCCCAGGGACUUGG	27	0.555556	GAGUUCUGGGCUGUAGUGCACU	22	0.545455	0.584	2.73664	3.34163	1.22107	no
nov-miR-14284-5p	chrY+:7261698_7261763	0.93	UUUGCCAGGCUGGAGUACAGUGG	23	0.565217	CUGUACCUCCUGGAUUCAAGC	21	0.52381	0.616	0.139971	0.40854	2.91875	no
nov-miR-4436-3p	chr17-:1528133_1528191	0.876	UGUCCAGCCUUGGCGACAGAACA	23	0.565217	CACUGUUGCCUAGGCUGGAGUAU	23	0.521739	0.764	0.219158	0.604617	2.75882	no
nov-miR-3732-3p	chr16+:87384337_87384393	1.558	UGCGGAGCUCUGCAGGGACCUU	22	0.636364	GCUCCCUGCGGAAGCCCCGGGGA	23	0.782609	0.545	0.187165	0.351883	1.88007	no
nov-miR-9881-3p	chr4+:1735492_1735560	1.076	CUAAGUGGUGUCCUGUGGCAGG	22	0.590909	AGCCCAGGAUGAAACUCUGAC	21	0.52381	0.502	0.0451562	0.428093	9.48029	no
nov-miR-4571-5p	chr17-:45049350_45049415	1.18	GCUCUGUUGCUCAAGCUGGAGUGCAGUG	28	0.571429	CUGCACCCUUGACCUGCUGAGCUC	24	0.625	0.513	0.167929	0.528801	3.14897	no
nov-miR-9509-3p	chr3-:161325050_161325118	1.059	CAUUUCUGGAAUCUGGGUCUUCAGAG	26	0.461538	CUGAGUCCAGAUUGGCAGGUGGA	23	0.565217	0.552	0.0808489	0.394185	4.87557	no
nov-miR-7366-3p	chr21+:46551613_46551671	0.828	UCAGAGUUCCCCCGUUUCUAGAG	23	0.521739	AAUGAUCGUGGGGAACCUGGUU	22	0.5	0.795	0.149342	0.445957	2.98615	no
nov-miR-1735-5p	chr12+:89455255_89455315	1.217	AACCCAGGAACUGGAGGCUGCAG	23	0.608696	CUGCACUUCAGCCUGGGUGA	20	0.6	0.587	0.1521	1.47853	9.72073	no
nov-miR-11620-3p	chr6-:28658244_28658308	1.183	GGGGAUGUAGCUCAGUGGUAGA	22	0.545455	GGUCCCGGGUUCGAUCCCCAGC	22	0.727273	0.514	0.932971	2.06982	2.21853	no
nov-miR-301-3p	chr10+:87050249_87050312	0.848	ACUAUGCUUUCAGGGAUCAUUUCU	24	0.375	AAGUUUCUCUGAACGUGUAAAGC	23	0.391304	0.6	1.35089	2.94843	2.18258	no
nov-miR-4894-3p	chr18+:9250638_9250701	1.13	GAGCCCAGGUAGGAGGCUGCAG	22	0.681818	UGCAUUCCAGCCUGGGCAACAGA	23	0.565217	0.578	0.104123	0.607275	5.83229	no
nov-miR-2875-5p	chr14-:68709255_68709322	0.913	AGCUGAUUCCUGGGCUCUGCCC	22	0.636364	GCAUCAUCCAAGAAUUGGCAGU	22	0.454545	0.518	1.00906	2.20214	2.18236	no
nov-miR-576-5p	chr10-:72870936_72870999	1.322	GAGCCCAGGAACUGGAGGAUGCAG	24	0.625	GCACUCCAGCCUGGGUAACA	20	0.6	0.5	0.126005	1.47905	11.738	no
nov-miR-2919-3p	chr14-:90497256_90497321	1.262	GUAGUCCCAGUUACUCAGGAGGCUGA	26	0.538462	AGCCUAGGAACUGGAGGCUGCAG	23	0.608696	0.632	0.126005	1.45477	11.5453	no
nov-miR-2918-5p	chr14-:90497217_90497278	1.126	AGCCUAGGAACUGGAGGCUGCAG	23	0.608696	CUGCACUCCAGCCUGGGUGAC	21	0.666667	0.634	0.126005	1.45477	11.5453	no
nov-miR-6958-5p	chr20+:42921505_42921566	1.091	AGCCCAGUAACUGGAGGCUGCAG	23	0.608696	GCACUUCAGUCUGGGCAAC	19	0.578947	0.533	0.126005	1.44194	11.4435	no
nov-miR-67-3p	chr10+:119068181_119068244	0.893	ACUAUGCCUUCGGGGCUCAUUUCU	24	0.5	AAGUUUCUCUGAACGUGUGGAGC	23	0.478261	0.621	1.81969	3.88969	2.13756	no
nov-miR-3464-3p	chr16+:13904961_13905022	0.936	AGACAAGAGUGCGAGCCUUCUGU	23	0.521739	AGAGGGCUCUUUGGUCUAG	19	0.526316	0.552	0.129335	0.620665	4.79888	no
nov-miR-322-5p	chr10+:92864753_92864810	1.063	UCAGGUCUUCAGACUGUGGGG	21	0.571429	CCCCUGGUUUGCAGGCCUUUUG	22	0.590909	0.559	0.126823	0.755741	5.95901	no
nov-miR-7459-3p	chr22+:20061556_20061615	0.909	CUGGAGACUCCCUGGAGGAAGCUG	24	0.625	GCUCUUCCUGGAGGCUGUGGAA	22	0.590909	0.614	0.10729	0.391453	3.64855	no
nov-miR-607-5p	chr10-:87203695_87203763	1.89	CGCGAGGUGGCGGAGGGGCCGCGCUUG	27	0.814815	GAACGCGAUCCGCGGCCUGUGGC	23	0.73913	0.503	0.399505	0.600965	1.50428	no
nov-miR-3133-3p	chr15+:82756010_82756069	0.997	AGGUAGAUAGAACAGGUCUUG	21	0.428571	AGACCUACUUAUCUACCAACAG	22	0.409091	0.675	0.734546	3.18972	4.34244	no
nov-miR-14012-3p	chrX+:96256765_96256825	0.955	GUUUCAGAAGGAAUGGUACCAGUU	24	0.416667	CUGGUAGCAUUCUGCUGUGAAUCC	24	0.5	0.578	0.0504395	0.477401	9.46482	no
nov-miR-10928-5p	chr5-:43232293_43232353	0.843	CUGUCAUCUCUGCUGAGAAAGC	22	0.5	UUUCUGUAGCAGAGACUGCCAGUG	24	0.5	0.756	0.035815	0.387284	10.8135	no
nov-miR-2000-5p	chr12-:49128435_49128493	0.76	CUGUCAUCUCUGCUGAGAAAGC	22	0.5	UUUCUGUAGCAGAGAUCACCAAU	23	0.391304	0.848	0.035815	0.387284	10.8135	no
nov-miR-2001-5p	chr12-:49185487_49185545	0.763	CUGUCAUCUCUGCUGAGAAAGC	22	0.5	UUUCUGUAGCAGAGAUCACCAAU	23	0.391304	0.848	0.035815	0.387284	10.8135	no
nov-miR-1618-5p	chr12+:49272698_49272756	0.93	CUGUCAUCUCUGCUGAGAAAGC	22	0.5	UUACUGUAGCAGAGAUCACCAAU	23	0.391304	0.563	0.035815	0.387284	10.8135	no
nov-miR-8677-3p	chr2-:218040992_218041044	0.985	UCCUUUCAGAUGGUUCUCUAGAG	23	0.434783	CUAGAGAACCAUCUGAAAGACU	22	0.409091	0.729	0.0451562	0.477584	10.5763	no
nov-miR-4460-3p	chr17-:19190179_19190240	0.751	UAUACUUUCAGGGAUCAUUUCU	22	0.318182	AAGUUUCUCUGAACGUGUAGAGC	23	0.434783	0.807	5.13809	8.72871	1.69882	no
nov-miR-4044-3p	chr17+:19188021_19188082	0.872	UAUACUUUCAGGGAUCAUUUCU	22	0.318182	AAGUUUCUCUGAACGUGUAGAGC	23	0.434783	0.715	5.13809	8.72871	1.69882	no
nov-miR-11716-3p	chr6-:68665179_68665241	0.892	CUAUACUUUCAGGGAUCAUUUCU	23	0.347826	AAGUUUCUCUGAACGUGUAGAGC	23	0.434783	0.731	5.13809	8.72871	1.69882	no
nov-miR-2343-3p	chr13-:27451236_27451289	0.925	UAGUUUUUCUUCGUACCAGGAA	22	0.363636	CCAGGUAUGAAGCCAGAUUAGG	22	0.5	0.62	0.0324791	0.409356	12.6036	no
nov-miR-13396-3p	chr9+:88374273_88374335	0.813	CUAUACUUUCAGGGAUCAUUUCU	23	0.347826	AAGUUUCUCUGAACGUGUAGAGC	23	0.434783	0.766	5.08871	8.72334	1.71425	no
nov-miR-4043-3p	chr17+:19061916_19061976	0.934	CUAUACUUUCAGGGAUCAUUU	21	0.333333	AAGUUUCUCUGAACGUGUAGA	21	0.380952	0.768	5.03414	8.71916	1.732	no
nov-miR-4457-3p	chr17-:19064072_19064132	0.858	CUAUACUUUCAGGGAUCAUU	20	0.35	AAGUUUCUCUGAACGUGUAGA	21	0.380952	0.549	5.03414	8.71916	1.732	no
nov-miR-976-3p	chr11+:74635600_74635665	0.776	AGCCCAGGAGUUGGACUGUUGC	22	0.590909	UGCAUUCCAGCCUGGGCAACAGA	23	0.565217	0.69	0.0680107	0.645983	9.49825	no
nov-miR-1526-3p	chr12+:12907837_12907906	0.894	GUCUGGUCUCAAACUUCAGAGAGC	24	0.5	CUCCUGAAGUGCUGGGAUUAUAGGC	25	0.52	0.681	0.0483698	0.5507	11.3852	no
nov-miR-3133-5p	chr15+:82756010_82756069	0.997	AGGUAGAUAGAACAGGUCUUG	21	0.428571	AGACCUACUUAUCUACCAACAG	22	0.409091	0.675	1.61948	5.25572	3.2453	no
nov-miR-386-3p	chr10-:117285333_117285393	0.855	GGCCUGUUGGCCAGAGUAAUC	21	0.571429	UAACUUUGGCCAGUUGGAAGA	21	0.428571	0.523	0.254925	2.0855	8.18084	no
nov-miR-10127-3p	chr4-:147481330_147481384	1.806	GCACCGACCGUGGAGCUCGGC	21	0.761905	CGGGUCCGCGCGGCGCCU	18	0.888889	0.512	0.126582	0.302497	2.38972	no
nov-miR-13867-5p	chrX+:153797464_153797526	1.019	GCUCUCUAUGCUGACGUCGGUGG	23	0.608696	ACUCGAGGCCAGGAUGUGGGGCGU	24	0.666667	0.583	0.0621338	0.404111	6.50388	no
nov-miR-4020-5p	chr17+:11277414_11277493	0.936	UGAUGCAUUGGACUGUAAGUG	21	0.428571	UUCACAGUGCCAGUGCAUUUUG	22	0.454545	0.595	0.377187	1.85063	4.90641	no
nov-miR-11142-3p	chr6+:146607956_146608017	0.947	AAUCGUUUCAGUAGGAUUGGUACCAGCU	28	0.428571	CUGGUAGAAUUCUGCAGUGAAUCC	24	0.458333	0.535	0.0276828	0.477073	17.2335	no
nov-miR-4546-3p	chr17-:41622963_41623028	0.938	UCACAGCCACCGUGGACAAUGC	22	0.590909	AAUGCCCGUCUGGCUGCUGAUG	22	0.590909	0.544	0.0760526	0.39485	5.1918	no
nov-miR-10897-3p	chr5-:181243827_181243886	1.164	GCGGCAGGAGAGGUUGUGGUGCU	23	0.652174	AUCCAGUGCCAUCCUCGUCGCUG	23	0.608696	0.52	0.0451562	0.382778	8.47676	no
nov-miR-5322-5p	chr19+:968910_968973	0.862	UCCCAAAGUGCUGGGAUUACAG	22	0.5	CCAAUCCCAGCAUUUUCGGAGG	22	0.545455	0.799	0.142709	1.79081	12.5487	no
nov-miR-6623-3p	chr1-:26357166_26357226	1.02	GAGGGCCAGGAGGGGUUGCUCAG	23	0.695652	GAGUGAUGAUUCUUGGCCAUGC	22	0.5	0.549	0.0324791	0.489133	15.0599	no
nov-miR-10926-5p	chr5-:40895722_40895775	1.052	CUCGCAGUUCGAUCUCAGACUG	22	0.545455	GUGAGCAAGGAACUGUGGGCA	21	0.571429	0.511	0.105318	1.58409	15.041	no
nov-miR-1404-5p	chr11-:93730516_93730577	0.66	GUUCUCUAUAGGAAGCCAUAGC	22	0.454545	UAUGUUUUCCUGAGGAGAUAUA	22	0.318182	0.739	0.149361	1.63488	10.9458	no
nov-miR-1301-5p	chr11-:65961439_65961496	0.84	CUGGAAGGACUUAGAGCCCAU	21	0.52381	UGGCUUUAAGUUCCUCCCCGG	21	0.571429	0.781	0.0595774	1.16863	19.6154	no
nov-miR-9762-3p	chr3-:98872116_98872176	1.015	CUAUACUUUCAGAGAUCACUUCU	23	0.347826	AAGUUUCUCUGAAUGUGUAGAA	22	0.318182	0.708	0.265439	2.21099	8.32955	no
nov-miR-4073-3p	chr17+:28467876_28467930	0.877	UUCGAGUCCGGCAUCUCCCAG	21	0.619048	CUGGAGAUGAACUCGGACCUCA	22	0.545455	0.581	0.111425	1.63422	14.6666	no
nov-miR-9611-3p	chr3-:32694174_32694237	0.965	ACUACACUUUCAGGGAUCAUUUCU	24	0.375	AAGUUUCUCUGAAAGUGUAGAGU	23	0.347826	0.705	0.919559	5.28068	5.74262	no
nov-miR-2869-3p	chr14-:67745408_67745471	0.976	ACUAUACUUUGAGGGAUCAUUUCU	24	0.333333	AAGUUUCUCUGAAUGUGUAGAGU	23	0.347826	0.583	0.852468	5.28825	6.20345	no
nov-miR-7121-3p	chr20-:33670798_33670856	1.365	GGCAGGGGUGCAGUCAGGGUCA	22	0.681818	UCCCUGUCCUCCCCCUGCCAC	21	0.714286	0.521	0.370417	0.946517	2.55528	no
nov-miR-13319-3p	chr9+:37804230_37804285	0.915	UUAGCCAGAGUUCCUAAAGAAA	22	0.363636	UCUUCAGGAACUCUGGCUAACU	22	0.454545	0.754	0	0.54974	#DIV/0!	no
nov-miR-9813-3p	chr4+:128550153_128550214	0.853	GAAACUUCUGGCCCCAUAGGA	21	0.52381	CUACGUGACCAGAAGUUUCAG	21	0.47619	0.755	0	0.445603	#DIV/0!	no
nov-miR-11298-3p	chr6+:41101996_41102054	0.865	GCUUUGUUGGUCAGGGUUUAC	21	0.47619	UCACCCUGACCUACAAGUCGG	21	0.571429	0.773	0	0.577403	#DIV/0!	no
nov-miR-7324-3p	chr21+:35451979_35452031	0.861	UUGCUCAGAGUUUCACGGAAA	21	0.428571	UGCAUGAAACUCUGAGCAAGA	21	0.428571	0.616	0	0.442639	#DIV/0!	no
nov-miR-1820-3p	chr12-:115991373_115991433	0.934	ACAAUUCAGGACUCUUCCUUGAAG	24	0.416667	UUGGGAAGAAUUCUGAUAUUGG	22	0.363636	0.538	0	0.850558	#DIV/0!	no
nov-miR-3455-5p	chr16+:12500703_12500775	0.988	AGCUUGUCGGAUGUGCAGAUUU	22	0.454545	AUCUGCAUGUUCACAGGCCCC	21	0.571429	0.563	0	0.620313	#DIV/0!	no
nov-miR-4127-3p	chr17+:4223317_4223384	1.13	AUAAUCCACAGGCAAUUUCUC	21	0.380952	CAGAUUGCCUGUGGAAUGAGC	21	0.52381	0.561	0	0.403137	#DIV/0!	no
nov-miR-9459-3p	chr3-:134175984_134176050	0.916	UGUUACCACAGGCAAUUUCUC	21	0.428571	CAGAUUGCCUGUGGAAUGAG	20	0.5	0.531	0	0.401151	#DIV/0!	no
nov-miR-12334-3p	chr7-:24914288_24914336	0.855	AUCAAGUUCUACUGGCUAGUAG	22	0.409091	ACUGGCUGGUAGAACUUGUUGC	22	0.5	0.591	0	0.481684	#DIV/0!	no
nov-miR-1697-5p	chr12+:69348384_69348467	0.918	CUAGCACUCUGACCUAGCAGUC	22	0.545455	CUGUUACGGUCCAGGGCAAGGU	22	0.590909	0.537	0	0.717154	#DIV/0!	no
nov-miR-12073-5p	chr7+:75970356_75970428	1.141	GCUGCAGUGAGCUAUGAUCGCAC	23	0.565217	GAGAUCAUCGCCCACUGCAGCUU	23	0.565217	0.755	0	0.466602	#DIV/0!	no
nov-miR-10931-3p	chr5-:45028509_45028564	1.089	AAAGUAAUUACAGGUUUUGCCA	22	0.318182	CAAAACCUGUAAUUACUUUUGC	22	0.318182	0.505	0	0.471246	#DIV/0!	no
nov-miR-9203-3p	chr3+:21829762_21829819	0.902	AAAAGUAAUUGUGGUCUUUGCC	22	0.363636	CAAAAGCUGUAAUUACUUUUGC	22	0.318182	0.753	0	0.45352	#DIV/0!	no
nov-miR-8862-5p	chr2-:69743121_69743192	1.084	UACCUCCUGAAUAGCUGAGAC	21	0.47619	CUCAGCUACUCAGGAGGUUGA	21	0.52381	0.754	0	0.414564	#DIV/0!	no
nov-miR-4010-5p	chr16-:89319987_89320049	1.014	CUGGUAGAAGUCACUGACACGGC	23	0.565217	CCUCGGCUGGCUCUGCCAUUU	21	0.619048	0.616	0	0.479242	#DIV/0!	no
nov-miR-6362-5p	chr1-:159934182_159934240	0.87	CUGCUCUUUGUCAGCUGGACC	21	0.571429	UGCAGCUGGACAAGGUACAGGC	22	0.590909	0.648	0	0.354961	#DIV/0!	no
nov-miR-13269-3p	chr9+:15425409_15425466	0.845	GGGUUUCACCAUGUUGGCCAGG	22	0.590909	UGACCUCAUGUGAUCUGCCCAA	22	0.5	0.544	0	0.458529	#DIV/0!	no
nov-miR-6216-3p	chr1-:103473320_103473384	1.095	AGCCCAGGGAGUUGAGGCUGCAG	23	0.652174	UGCAUUCAAGCCUGGGCUACAGA	23	0.521739	0.598	0	0.43199	#DIV/0!	no

## Sheet: Table S2
Supplementary Table S2. Correlation analysis showing 9 candidate miRNAs and 81 target genes expressed in right colon, left colon and rectal tumor samples that showed negative correlation between their expression levels.
R-CRC: Right-sided colorectal cancer; L-CRC: left-sided colorectal cancer; and RC: rectal cancer. Spearman test: (*) p≤0.05; (**) p≤0.01
nov-miRNA		R-CRC						L-CRC						RC
			expression		correlation				expression		correlation				expression		correlation
		Gene	logFC	p	r	p		Gene	logFC	p	r	p		Gene	logFC	p	r	p
Up-regulated novel microRNA
nov-miR-13172-3p		RUNDC3B	-3.03	**	-0.16	*		SYT2	-2.47	**	-0.27	**		PALM	-2.81	*	-0.22	**
		DAAM2	-2.5	**	-0.18	*		RUNDC3B	-2.85	**	-0.2	**		AFF3	-4.16	**	-0.35	**
		DLG2	-2	**	-0.17	*		DAAM2	-2.36	**	-0.33	**		DAAM2	-2.56	*	-0.34	**
		AFF3	-3.73	**	-0.28	**		PALM	-2.45	**	-0.3	**		-
		SLC5A12	-3.04	**	-0.23	**		DLG2	-2.53	**	-0.43	**
		PLA2G5	-2.59	**	-0.17	*		AFF3	-4.37	**	-0.3	**
		-						PCDH9	-3.37	**	-0.43	**
								SLC5A12	-3.68	**	-0.22	**
								PLA2G5	-3.63	**	-0.29	**
								CRB1	-5.63	**	-0.16	*
								SDK1	-2.03	**	-0.21	**
nov-miR-13844-5p		KLF4	-2.61	**	-0.17	*		-						PDE4D	-2.74	**	-0.2	*
		SSBP2	-2.16	**	-0.21	**
		GABRG2	-9.11	**	-0.24	**
nov-miR-3345-5p		GRIK2	-2.85	**	-0.16	*		GRIK2	-2.94	**	-0.27	**		PPM1L	-2.06	*	-0.19	*
		BNC2	-2.15	**	-0.19	*		ZFPM2	-2.07	**	-0.28	**		TCF21	-2.63	*	-0.18	*
		TCF21	-2.95	**	-0.16	*		BNC2	-2.55	**	-0.35	**		BNC2	-3.35	*	-0.35	**
		SYNM	-4.15	**	-0.17	*		TCF21	-2.58	**	-0.19	**		SYNM	-6	**	-0.36	**
		MS4A2	-3.04	**	-0.16	*		MMRN1	-5.18	**	-0.18	*		-
		KLHL14	-3.57	**	-0.19	*		SYNM	-5.21	**	-0.27	**
		-						MS4A2	-3.48	**	-0.15	*
								RIMS2	-4.23	**	-0.26	**
								KLHL14	-3.52	*	-0.26	**
nov-miR-7154-5p		SERTAD4	-2.02	**	-0.34	**		CPED1	-2.81	**	-0.21	**		EPHA7	-5.68	**	-0.17	*
		-						CADM2	-8.52	**	-0.24	**		-
								SERTAD4	-2.54	**	-0.3	**
								BEND6	-2.49	*	-0.32	**
								EPHA5	-6.06	**	-0.23	**
nov-miR-766-3p		VSX1	-5.38	**	-0.16	*		BCL2	-2.2	**	-0.21	**		CNTN4	-2.72	*	-0.29	**
		CADM2	-8.06	**	-0.39	**		PRICKLE2	-2.1	**	-0.25	**		PIK3CG	-3.19	*	-0.29	**
nov-miR-8861-5p		ELMOD1	-4.26	**	-0.15	*		SVIL	-2.27	**	-0.24	**		NPTX1	-7.82	*	-0.25	**
		STOX2	-3.56	**	-0.32	**		JAZF1	-2.28	**	-0.36	**		PEG3	-4.16	**	-0.25	**
		PLN	-3.9	**	-0.37	**		SSPN	-2.39	**	-0.39	**		SSPN	-2.83	*	-0.25	**
		PRKG2	-4.67	**	-0.19	*		ZEB1	-2.13	**	-0.37	**		PALLD	-2.76	**	-0.24	**
		AQP4	-6.72	**	-0.22	**		SLC7A2	-2.37	**	-0.31	**		EBF1	-2.46	*	-0.24	**
		P2RY13	-2.05	**	-0.3	*		MTUS2	-3.7	**	-0.16	*		ZEB1	-3.1	**	-0.23	**
		BEND4	-4.72	**	-0.23	**		CADM2	-8.52	**	-0.17	*		STOX2	-3.34	*	-0.23	**
		PDE7B	-2.74	**	-0.28	**		CNTN4	-2.91	**	-0.42	**		SPARCL1	-3.4	*	-0.23	**
		PCDH11X	-5.78	**	-0.2	**		ELMOD1	-4.48	**	-0.32	**		JAZF1	-2.91	**	-0.22	**
		SPARCL1	-2.59	**	-0.36	**		STOX2	-3.01	**	-0.34	**		PLN	-5.65	*	-0.21	*
		PQLC2L	-3.12	**	-0.17	*		PLN	-4.59	**	-0.31	**		UNC5C	-2.54	*	-0.19	*
		PGM5	-3.79	**	-0.23	**		PRKG2	-5.1	**	-0.18	*		BCL2	-2.59	**	-0.19	*
		UNC5C	-2.76	**	-0.25	**		SPTA1	-3.53	*	-0.23	**		PDE7B	-3.31	**	-0.19	*
		SUSD5	-3.34	**	-0.3	**		AQP4	-7.44	**	-0.24	**		PRICKLE2	-2.84	**	-0.18	*
		PCK1	-3.72	**	-0.15	*		P2RY13	-2.01	**	-0.3	**		EIF4E3	-2.21	*	-0.17	*
		PEG3	-3.43	**	-0.26	**		CACNA1B	-4	**	-0.26	**		SVIL	-2.94	**	-0.17	*
		PTCHD1	-4.62	**	-0.21	**		PDE7B	-2.88	**	-0.25	**		TFAP2B	-9.92	**	-0.17	*
		EIF4E3	-2.04	**	-0.17	*		MKRN3	-3.76	*	-0.15	*		-
		CHGB	-4.9	**	-0.19	*		SPARCL1	-2.85	**	-0.35	**
		NPTX1	-5.31	**	-0.24	**		PGM5	-4.46	**	-0.16	*
		PIK3CG	-2.45	**	-0.34	*		GLRA3	-4.29	**	-0.14	*
		PLP1	-7.93	**	-0.29	**		KIF5C	-2.96	**	-0.24	**
		HDAC9	-2.4	**	-0.23	**		UNC5C	-3.03	**	-0.29	**
		SLC8A3	-4.07	**	-0.16	*		SUSD5	-2.24	*	-0.36	**
		BEND6	-2.24	**	-0.31	**		FGF14	-3.12	*	-0.23	**
		PLCXD3	-6.69	**	-0.2	*		PEG3	-3.45	**	-0.41	**
		MEI4	-2.44	*	-0.2	**		PTCHD1	-5.06	**	-0.25	**
		CNTN4	-2.91	**	-0.35	*		EIF4E3	-2.3	**	-0.21	**
		-						NPTX1	-6.33	**	-0.26	**
								PIK3CG	-2.43	**	-0.34	**
								PLP1	-7.98	**	-0.18	*
								KCNIP1	-5.03	**	-0.26	**
								HDAC9	-2.26	**	-0.25	**
								SLC8A3	-3.52	**	-0.32	**
								BEND6	-2.49	*	-0.38	**
								PLCXD3	-7.43	**	-0.31	**
								MEI4	-4.21	**	-0.19	*
Down-regulated novel microRNAs
nov-miR-1156-5p		-						-						RNF183	3.83	**	-0.17	*
nov-miR-590-5p		HOMER1	2.27	**	-0.16	*		TBX15	2.09	**	-0.18	*		-
nov-miR-5065-5p		-						ERP27	2.2	**	-0.19	*		-

## Sheet: Table S3
Table S3. Clinical features of 511 colorectal cancer patients from The Cancer Genome Atlas (TCGA).
Clinical Feature		Number (%)
Age	Range	31-90
	Median	68
Sex	Male	271 (52.93)
	Female	240 (46.88)
Anatomical Site	Colon	82 (16.05)
	Right-sided colon	172 (33.66)
	Left-sided colon	180 (35.23)
	Rectum	77 (15.07)
Staging	I	88 (17.22)
	II	179 (35.03)
	III	146 (28.57)
	IV	79 (15.46)
	N/A	19 (3.72)
Follow-up	Range (months)	0 - 148
	Median	22
Vital Status	Alive	405 (79.26)
	Dead	106 (20.74)
